# Supplementary material for: Molecular Human Targets of Bioactive Alkaloid-Type Compounds from Tabernaemontana cymose Jacq
Source: MDPI journal article supplement (doi:10.3390/molecules26123765), 2021-06-21
Supplement: s1 [file s1]

## SUPPLEMENTARY MATERIAL

1. **High performance liquid chromatography and molecule identification:** The gradient profile was developed as follows: 0-1 min, 90% Solvent A; 1-3 min 80% solvent A; 3-13 min 50% solvent A; 13-24 min 33% solvent A; 24-26 min 29% solvent A; 26-35 min 25% solvent A; 35-41 min 20% solvent A; 41-45 min 2% solvent A.

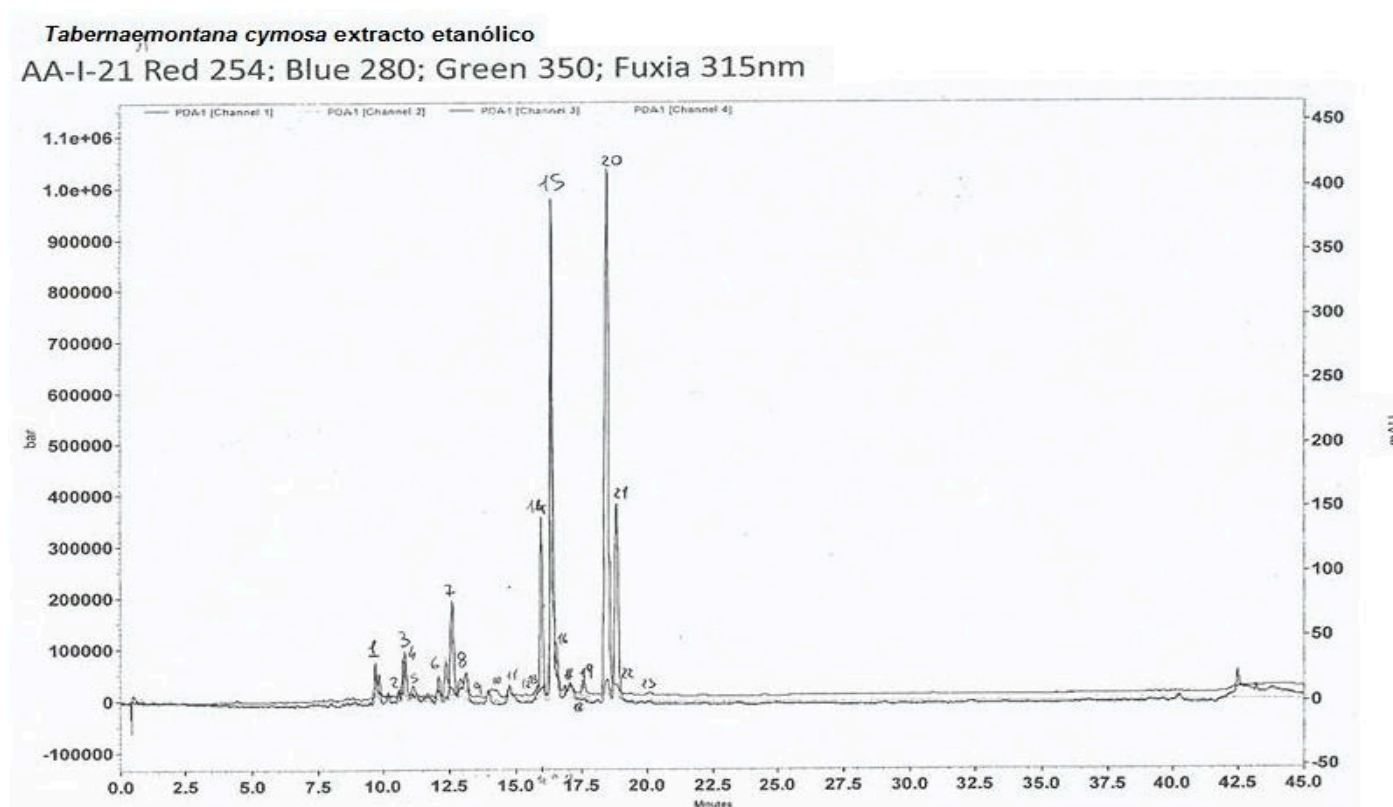

## 2. Molecular docking

**Table S1.** Potential targets and binding affinities of *Tabernaemontana cymosa* alkaloids to 951 human proteins evaluated.

| Protein /<br>molecule | Binding affinity energies (kcal/mol) |                            |                            |                       |                     |                                    |            |           |             |            |
|-----------------------|--------------------------------------|----------------------------|----------------------------|-----------------------|---------------------|------------------------------------|------------|-----------|-------------|------------|
|                       | 3-Oxo-<br>tabersoni<br>ne            | 3-Oxo-<br>coronarid<br>ine | 5-Oxo-<br>coronarid<br>ine | 5-Oxo-<br>tabersonine | Iso-<br>voacristine | Voacangine<br>hidroxyndol<br>enine | Rupicoline | Vincinine | Voacristine | Voacangine |
| <b>1E31</b>           | -7.20                                | -6.90                      | -7.10                      | -6.60                 | -6.90               | -6.80                              | -6.70      | -7.40     | -7.40       | -7.30      |
| <b>1E99</b>           | -7.20                                | -8.00                      | -8.20                      | -7.00                 | -6.50               | –                                  | -7.00      | -7.40     | -7.50       | -7.13      |
| <b>121P</b>           | -7.60                                | -8.50                      | -7.80                      | -7.50                 | -6.80               | -8.70                              | -7.50      | -8.00     | -8.20       | -8.03      |
| <b>17GS</b>           | -8.50                                | -8.20                      | -7.80                      | -8.60                 | -7.60               | -7.70                              | -7.50      | -8.10     | -8.40       | -7.40      |
| <b>1A28</b>           | -7.80                                | -7.90                      | -8.10                      | -7.70                 | -8.20               | -8.10                              | -8.10      | -7.90     | -9.10       | -8.33      |
| <b>1A2B</b>           | -7.10                                | -7.50                      | -7.60                      | -7.10                 | -6.50               | -7.40                              | -6.80      | -7.10     | -7.70       | -7.23      |
| <b>1A4R</b>           | -8.00                                | -7.90                      | -8.10                      | -8.00                 | -7.10               | -7.90                              | -7.40      | -7.70     | -8.10       | -7.40      |
| <b>1A4W</b>           | -8.50                                | -7.50                      | -7.30                      | -8.20                 | -8.40               | –                                  | -7.50      | -7.00     | -7.50       | -8.03      |
| <b>1A52</b>           | -8.00                                | -7.40                      | -8.70                      | -7.50                 | -7.20               | -7.30                              | -7.50      | -6.80     | -7.70       | -7.10      |
| <b>1A9U</b>           | -7.30                                | -7.50                      | -7.80                      | -7.40                 | -6.80               | –                                  | -7.10      | -7.60     | -7.40       | -7.37      |
| <b>1AAX</b>           | -7.10                                | -6.60                      | -7.00                      | -7.10                 | -6.80               | -6.90                              | -7.00      | -6.90     | -7.10       | -6.70      |
| <b>1AD8</b>           | -8.40                                | -7.40                      | -7.30                      | -8.20                 | -7.10               | -7.40                              | -6.90      | -7.10     | -7.60       | -7.47      |
| <b>1AE8</b>           | -8.10                                | -7.50                      | -7.80                      | -8.30                 | -7.90               | –                                  | -7.20      | -7.30     | -7.90       | -8.47      |
| <b>1AIE</b>           | -6.90                                | -6.60                      | -6.90                      | -6.90                 | -6.10               | -6.50                              | -6.10      | -6.80     | -6.40       | -6.30      |
| <b>1AO6</b>           | -7.90                                | -8.30                      | -8.30                      | -8.10                 | -8.50               | -8.40                              | -8.60      | -8.00     | -8.30       | -8.47      |
| <b>1AWI</b>           | -7.80                                | -8.00                      | -7.70                      | -7.90                 | -7.70               | -7.40                              | -7.10      | -7.50     | -8.90       | -7.50      |

|             |       |       |       |       |       |       |       |       |       |       |
|-------------|-------|-------|-------|-------|-------|-------|-------|-------|-------|-------|
| <b>1B1I</b> | -6.10 | -6.90 | -7.00 | -6.40 | -6.50 | -6.70 | -6.00 | -6.60 | -7.00 | -6.47 |
| <b>1B41</b> | -8.10 | -7.50 | -7.60 | -8.00 | -7.70 | -8.10 | -7.20 | -7.20 | -7.30 | -7.20 |
| <b>1BJ4</b> | -6.90 | -7.10 | -7.40 | -7.50 | -7.10 | -     | -7.20 | -7.70 | -7.10 | -7.53 |
| <b>1BP3</b> | -7.60 | -8.10 | -8.30 | -7.70 | -7.80 | -7.80 | -7.80 | -7.70 | -9.00 | -7.70 |
| <b>1BQQ</b> | -6.90 | -7.20 | -7.60 | -7.00 | -7.10 | -7.10 | -7.00 | -7.40 | -7.00 | -7.37 |
| <b>1BSX</b> | -7.00 | -7.10 | -7.00 | -7.40 | -8.30 | -7.60 | -7.20 | -7.30 | -7.40 | -7.17 |
| <b>1BX4</b> | -7.70 | -8.10 | -8.30 | -8.10 | -8.00 | -7.80 | -7.40 | -8.50 | -8.50 | -7.60 |
| <b>1C1Y</b> | -7.80 | -7.70 | -7.40 | -8.00 | -8.10 | -     | -7.50 | -7.10 | -7.20 | -8.23 |
| <b>1C5X</b> | -7.40 | -7.20 | -7.30 | -7.20 | -7.90 | -7.60 | -7.60 | -7.30 | -7.20 | -7.77 |
| <b>1C85</b> | -6.80 | -6.60 | -6.80 | -6.90 | -6.80 | -6.90 | -6.90 | -6.70 | -6.60 | -6.53 |
| <b>1CBS</b> | -7.30 | -7.50 | -8.20 | -7.50 | -7.10 | -8.40 | -8.70 | -7.20 | -8.10 | -8.30 |
| <b>1CG6</b> | -7.50 | -7.60 | -7.40 | -7.90 | -6.90 | -     | -7.20 | -6.70 | -7.40 | -7.10 |
| <b>1CJY</b> | -6.40 | -5.80 | -7.00 | -7.30 | -7.30 | -     | -6.00 | -6.10 | -6.30 | -7.23 |
| <b>1CP3</b> | -7.90 | -7.60 | -8.60 | -8.20 | -7.80 | -7.70 | -6.90 | -8.00 | -7.50 | -7.00 |
| <b>1CZA</b> | -7.30 | -7.00 | -7.20 | -7.20 | -7.10 | -7.30 | -7.30 | -7.10 | -7.30 | -7.23 |
| <b>1D5R</b> | -7.90 | -8.10 | -8.40 | -8.30 | -7.60 | -7.90 | -7.30 | -7.80 | -7.70 | -7.60 |
| <b>1DAN</b> | -7.70 | -7.70 | -7.50 | -7.70 | -7.40 | -7.70 | -7.30 | -7.50 | -7.80 | -7.47 |
| <b>1DB1</b> | -7.70 | -8.20 | -9.70 | -7.20 | -7.60 | -8.50 | -9.30 | -7.20 | -9.00 | -9.20 |
| <b>1DBH</b> | -7.50 | -7.20 | -7.80 | -7.20 | -7.50 | -7.60 | -7.80 | -7.70 | -7.70 | -7.90 |
| <b>1DCY</b> | -7.10 | -7.50 | -7.40 | -7.00 | -7.70 | -7.60 | -6.70 | -7.20 | -7.40 | -7.97 |
| <b>1DEB</b> | -5.80 | -5.70 | -6.00 | -5.60 | -5.50 | -6.00 | -5.60 | -6.10 | -5.90 | -5.90 |

|             |       |       |       |       |       |       |       |       |       |       |
|-------------|-------|-------|-------|-------|-------|-------|-------|-------|-------|-------|
| <b>1DGB</b> | -8.20 | -8.50 | -8.60 | -8.80 | -8.00 | -8.60 | -8.10 | -8.30 | -8.40 | -7.87 |
| <b>1DHT</b> | -8.30 | -8.00 | -8.60 | -8.20 | -8.10 | -     | -8.30 | -8.20 | -8.40 | -7.80 |
| <b>1DKF</b> | -8.30 | -8.40 | -9.30 | -8.80 | -8.30 | -8.10 | -7.70 | -7.80 | -7.90 | -7.70 |
| <b>1DQA</b> | -8.00 | -7.50 | -8.20 | -7.80 | -7.90 | -7.70 | -7.50 | -8.10 | -7.70 | -7.73 |
| <b>1DTW</b> | -7.90 | -6.90 | -7.20 | -7.80 | -8.00 | -7.50 | -8.30 | -7.40 | -7.10 | -7.77 |
| <b>1E3K</b> | -7.90 | -7.90 | -8.50 | -7.60 | -8.20 | -9.50 | -9.10 | -8.20 | -8.70 | -8.33 |
| <b>1E8Y</b> | -8.30 | -8.60 | -8.70 | -8.10 | -8.30 | -8.70 | -8.30 | -9.00 | -9.10 | -8.20 |
| <b>1ECV</b> | -6.80 | -6.70 | -6.90 | -6.80 | -6.30 | -6.90 | -6.80 | -6.80 | -7.00 | -6.53 |
| <b>1EDM</b> | -5.90 | -6.20 | -6.00 | -6.20 | -6.10 | -6.00 | -6.20 | -6.50 | -6.20 | -6.60 |
| <b>1EF1</b> | -8.60 | -8.30 | -8.10 | -8.50 | -8.20 | -8.00 | -8.20 | -7.90 | -8.50 | -7.90 |
| <b>1EK3</b> | -6.90 | -7.20 | -7.30 | -6.80 | -6.90 | -7.10 | -7.30 | -6.90 | -7.60 | -7.30 |
| <b>1ERR</b> | -7.70 | -7.00 | -7.90 | -7.30 | -7.00 | -6.90 | -7.70 | -7.00 | -6.90 | -7.00 |
| <b>1ETA</b> | -6.80 | -7.40 | -8.00 | -6.80 | -6.40 | -7.10 | -6.70 | -7.00 | -7.00 | -7.30 |
| <b>1ETB</b> | -7.20 | -7.40 | -7.90 | -6.90 | -6.40 | -7.20 | -6.60 | -7.10 | -7.20 | -7.33 |
| <b>1EV3</b> | -7.20 | -7.70 | -6.80 | -7.20 | -6.70 | -6.80 | -6.40 | -7.20 | -7.70 | -6.90 |
| <b>1EXT</b> | -7.40 | -7.00 | -8.30 | -7.10 | -7.00 | -7.20 | -7.90 | -7.40 | -7.70 | -7.77 |
| <b>1F3M</b> | -7.40 | -7.10 | -7.70 | -7.50 | -7.40 | -7.20 | -7.10 | -7.60 | -7.20 | -7.17 |
| <b>1F86</b> | -7.00 | -7.50 | -7.70 | -7.10 | -7.30 | -7.60 | -7.90 | -7.90 | -7.30 | -7.20 |
| <b>1F9Q</b> | -7.00 | -6.90 | -7.60 | -7.60 | -6.50 | -7.70 | -6.40 | -7.50 | -7.00 | -7.20 |
| <b>1FBY</b> | -7.20 | -7.50 | -8.50 | -7.40 | -7.30 | -7.40 | -7.80 | -7.70 | -7.10 | -7.17 |
| <b>1FCX</b> | -7.20 | -7.30 | -7.50 | -7.50 | -7.60 | -7.00 | -7.20 | -8.10 | -7.60 | -7.37 |

|             |       |       |       |       |       |       |       |       |       |       |
|-------------|-------|-------|-------|-------|-------|-------|-------|-------|-------|-------|
| <b>1FD0</b> | -7.20 | -7.30 | -8.00 | -7.40 | -7.60 | -7.00 | -7.30 | -8.10 | -7.70 | -7.67 |
| <b>1FKG</b> | -8.10 | -7.40 | -8.40 | -8.10 | -7.10 | -7.60 | -7.20 | -7.80 | -8.20 | -7.30 |
| <b>1FLT</b> | -7.30 | -7.70 | -7.20 | -7.40 | -7.40 | -7.40 | -6.80 | -7.30 | -7.90 | -8.00 |
| <b>1FM6</b> | -7.80 | -7.90 | -8.20 | -8.00 | -8.30 | -8.20 | -8.10 | -7.60 | -7.90 | -9.20 |
| <b>1FM9</b> | -7.20 | -6.90 | -7.50 | -7.40 | -7.30 | -7.10 | -6.90 | -7.20 | -7.40 | -8.70 |
| <b>1G1U</b> | -9.30 | -8.60 | -9.40 | -9.10 | -8.40 | -8.50 | -8.20 | -8.80 | -8.50 | -8.70 |
| <b>1G4U</b> | -6.90 | -7.40 | -7.80 | -7.20 | -6.90 | -     | -7.20 | -7.70 | -7.40 | -7.80 |
| <b>1G5Y</b> | -9.40 | -8.50 | -9.20 | -9.20 | -8.00 | -8.10 | -7.80 | -8.90 | -8.30 | -8.43 |
| <b>1G73</b> | -7.70 | -7.10 | -8.20 | -7.50 | -7.50 | -8.40 | -7.10 | -7.40 | -7.40 | -7.40 |
| <b>1GFW</b> | -8.40 | -7.40 | -7.20 | -8.40 | -7.50 | -7.30 | -7.10 | -7.80 | -7.70 | -7.00 |
| <b>1GH7</b> | -6.30 | -6.30 | -6.80 | -6.90 | -6.70 | -6.60 | -6.30 | -6.50 | -6.70 | -6.40 |
| <b>1GIH</b> | -7.40 | -6.90 | -7.30 | -7.30 | -6.80 | -     | -7.00 | -7.90 | -7.10 | -7.50 |
| <b>1GII</b> | -7.10 | -7.40 | -7.40 | -7.30 | -6.90 | -     | -7.00 | -7.50 | -7.20 | -6.90 |
| <b>1GJO</b> | -7.20 | -8.30 | -8.90 | -7.30 | -6.80 | -7.60 | -7.80 | -7.80 | -7.80 | -7.60 |
| <b>1GS4</b> | -7.30 | -7.10 | -7.50 | -7.20 | -7.00 | -7.70 | -6.90 | -6.90 | -8.30 | -7.37 |
| <b>1GUL</b> | -8.40 | -7.50 | -7.60 | -8.10 | -7.60 | -7.40 | -7.30 | -7.40 | -7.70 | -7.70 |
| <b>1GUM</b> | -8.30 | -7.40 | -7.10 | -8.20 | -7.20 | -7.30 | -7.30 | -7.40 | -7.90 | -7.37 |
| <b>1GWX</b> | -6.90 | -7.10 | -7.10 | -7.00 | -7.10 | -8.20 | -7.50 | -6.90 | -7.30 | -6.73 |
| <b>1H00</b> | -6.90 | -6.70 | -7.30 | -7.00 | -7.00 | -     | -7.00 | -7.30 | -6.90 | -6.60 |
| <b>1H8I</b> | -8.30 | -7.30 | -7.60 | -8.20 | -7.30 | -7.40 | -6.90 | -7.30 | -7.60 | -7.33 |
| <b>1H9O</b> | -6.00 | -6.50 | -6.20 | -5.70 | -5.70 | -5.80 | -5.90 | -6.20 | -6.60 | -5.70 |

|             |       |       |        |       |       |       |        |       |       |       |
|-------------|-------|-------|--------|-------|-------|-------|--------|-------|-------|-------|
| <b>1H9U</b> | -8.70 | -9.40 | -9.70  | -8.30 | -7.20 | -8.30 | -7.80  | -8.30 | -8.10 | -8.90 |
| <b>1HCG</b> | -8.30 | -7.80 | -7.60  | -8.50 | -7.20 | -7.80 | -6.90  | -8.20 | -7.50 | -8.00 |
| <b>1HFQ</b> | -9.90 | -9.40 | -10.00 | -9.80 | -9.20 | -     | -10.00 | -9.20 | -9.20 | -9.10 |
| <b>1HK1</b> | -8.20 | -8.80 | -8.40  | -8.10 | -8.20 | -8.50 | -8.60  | -8.10 | -8.20 | -8.57 |
| <b>1HK2</b> | -7.90 | -8.20 | -8.30  | -8.40 | -8.30 | -8.40 | -7.90  | -8.30 | -8.60 | -8.40 |
| <b>1HK3</b> | -8.30 | -8.40 | -8.40  | -8.40 | -8.30 | -8.60 | -8.30  | -8.30 | -8.80 | -8.97 |
| <b>1HK4</b> | -8.40 | -8.20 | -8.60  | -8.90 | -8.60 | -9.00 | -8.60  | -8.50 | -8.50 | -8.13 |
| <b>1HK5</b> | -8.90 | -8.50 | -9.20  | -9.00 | -8.30 | -8.60 | -8.60  | -8.90 | -8.60 | -7.93 |
| <b>1I09</b> | -7.90 | -7.80 | -8.80  | -7.60 | -7.20 | -7.50 | -7.70  | -7.80 | -8.00 | -7.50 |
| <b>1I3O</b> | -7.30 | -7.20 | -8.10  | -7.50 | -7.40 | -7.50 | -7.30  | -7.80 | -7.70 | -7.67 |
| <b>1I44</b> | -6.70 | -6.50 | -6.50  | -6.40 | -6.30 | -6.30 | -6.10  | -6.60 | -6.90 | -6.30 |
| <b>1I5R</b> | -8.80 | -8.00 | -9.40  | -8.60 | -7.50 | -8.60 | -7.40  | -9.50 | -8.30 | -7.77 |
| <b>1I7I</b> | -7.90 | -8.00 | -8.40  | -7.70 | -7.40 | -7.90 | -7.20  | -7.90 | -8.20 | -7.90 |
| <b>1ICT</b> | -7.90 | -8.00 | -8.20  | -8.00 | -7.90 | -8.70 | -8.40  | -8.20 | -8.30 | -8.20 |
| <b>1IG1</b> | -9.00 | -7.80 | -8.10  | -9.00 | -7.60 | -8.20 | -7.80  | -8.00 | -8.00 | -7.60 |
| <b>1IMV</b> | -7.70 | -7.10 | -7.20  | -7.60 | -7.00 | -7.10 | -6.80  | -7.40 | -7.40 | -6.80 |
| <b>1IR3</b> | -6.60 | -7.50 | -7.70  | -6.80 | -7.10 | -7.50 | -6.40  | -7.50 | -7.00 | -7.00 |
| <b>1IT6</b> | -8.60 | -7.30 | -7.50  | -8.60 | -7.90 | -7.50 | -7.20  | -7.50 | -7.00 | -7.20 |
| <b>1J1A</b> | -8.50 | -8.80 | -9.20  | -9.10 | -8.10 | -9.00 | -8.70  | -9.10 | -8.60 | -8.13 |
| <b>1J1B</b> | -7.80 | -8.50 | -8.20  | -7.50 | -7.50 | -     | -7.60  | -9.00 | -7.90 | -7.57 |
| <b>1J4X</b> | -6.40 | -6.20 | -6.20  | -6.40 | -6.60 | -6.00 | -6.20  | -6.20 | -6.10 | -5.90 |

|             |       |       |       |       |       |       |       |       |       |       |
|-------------|-------|-------|-------|-------|-------|-------|-------|-------|-------|-------|
| <b>1J8F</b> | -8.60 | -8.30 | -8.50 | -8.40 | -7.90 | -8.10 | -8.20 | -8.10 | -8.50 | -8.30 |
| <b>1JDH</b> | -7.20 | -6.70 | -6.80 | -6.90 | -6.60 | -6.60 | -6.40 | -7.10 | -6.70 | -7.00 |
| <b>1JF7</b> | -7.40 | -7.50 | -7.40 | -7.40 | -7.20 | -8.00 | -7.40 | -7.40 | -7.70 | -7.57 |
| <b>1JKL</b> | -9.10 | -7.70 | -8.00 | -9.20 | -7.80 | -7.70 | -7.70 | -7.60 | -8.00 | -7.80 |
| <b>1JMJ</b> | -7.70 | -8.20 | -7.90 | -8.00 | -7.90 | -7.70 | -7.50 | -8.40 | -7.50 | -7.17 |
| <b>1JSV</b> | -7.20 | -7.70 | -8.30 | -6.90 | -6.90 | -     | -6.70 | -8.20 | -7.30 | -7.63 |
| <b>1JU5</b> | -6.20 | -6.50 | -7.40 | -6.60 | -6.70 | -7.00 | -7.20 | -7.20 | -7.20 | -7.10 |
| <b>1JYR</b> | -6.00 | -5.80 | -6.00 | -6.30 | -6.10 | -5.90 | -6.30 | -6.20 | -6.00 | -5.93 |
| <b>1K3A</b> | -7.40 | -7.30 | -7.50 | -7.50 | -7.50 | -7.40 | -7.00 | -7.90 | -7.50 | -7.17 |
| <b>1K6M</b> | -7.50 | -8.70 | -7.90 | -8.10 | -7.30 | -8.40 | -9.50 | -7.50 | -8.90 | -7.33 |
| <b>1K74</b> | -7.30 | -6.90 | -7.70 | -7.40 | -7.00 | -6.80 | -6.70 | -6.90 | -7.00 | -6.93 |
| <b>1K7L</b> | -8.10 | -7.80 | -7.50 | -8.10 | -7.90 | -7.90 | -7.40 | -7.60 | -7.90 | -7.37 |
| <b>1KAO</b> | -7.10 | -6.80 | -7.60 | -7.30 | -6.90 | -     | -7.00 | -7.30 | -6.80 | -6.90 |
| <b>1KAV</b> | -6.70 | -6.50 | -6.90 | -6.70 | -6.90 | -7.10 | -7.00 | -6.70 | -6.80 | -6.80 |
| <b>1KBH</b> | -6.40 | -6.30 | -6.50 | -6.40 | -6.60 | -6.10 | -6.00 | -6.10 | -6.30 | -6.50 |
| <b>1KE5</b> | -7.10 | -7.10 | -7.60 | -6.90 | -6.40 | -     | -7.30 | -7.70 | -7.10 | -7.00 |
| <b>1KE8</b> | -7.10 | -7.30 | -7.80 | -6.90 | -6.50 | -     | -7.30 | -7.70 | -7.30 | -7.10 |
| <b>1KKQ</b> | -7.70 | -7.50 | -8.40 | -8.20 | -8.20 | -8.20 | -8.60 | -8.00 | -8.00 | -8.30 |
| <b>1KPF</b> | -6.80 | -7.30 | -7.70 | -7.00 | -6.90 | -6.80 | -6.80 | -6.70 | -7.30 | -7.00 |
| <b>1KV2</b> | -7.60 | -8.70 | -8.50 | -7.60 | -7.60 | -7.80 | -7.40 | -8.60 | -8.00 | -7.63 |
| <b>1KV6</b> | -7.70 | -7.30 | -8.40 | -7.50 | -7.30 | -7.60 | -7.80 | -7.00 | -7.40 | -8.00 |

|             |       |       |        |       |        |        |       |       |       |       |
|-------------|-------|-------|--------|-------|--------|--------|-------|-------|-------|-------|
| <b>1L6J</b> | -8.00 | -7.50 | -8.40  | -8.10 | -7.80  | -8.30  | -7.40 | -7.60 | -8.00 | -7.20 |
| <b>1LBD</b> | -6.90 | -8.10 | -7.20  | -6.80 | -7.00  | -7.70  | -7.00 | -6.80 | -8.40 | -6.80 |
| <b>1LV2</b> | -7.50 | -7.60 | -8.10  | -8.00 | -7.50  | -8.60  | -7.80 | -7.50 | -8.30 | -7.60 |
| <b>1LYW</b> | -8.50 | -8.20 | -8.90  | -8.90 | -7.60  | -8.70  | -8.10 | -8.20 | -8.40 | -9.47 |
| <b>1M05</b> | -7.90 | -9.10 | -9.20  | -8.10 | -8.90  | -8.60  | -8.80 | -8.60 | -8.90 | -8.07 |
| <b>1M13</b> | -8.40 | -8.90 | -9.60  | -8.60 | -8.70  | -8.80  | -8.50 | -8.30 | -8.50 | -8.43 |
| <b>1M17</b> | -7.80 | -7.40 | -7.70  | -7.80 | -7.70  | -7.40  | -7.00 | -7.60 | -7.80 | -7.37 |
| <b>1MAZ</b> | -7.60 | -7.30 | -7.10  | -7.30 | -7.00  | -7.20  | -6.90 | -6.90 | -7.30 | -7.70 |
| <b>1MCH</b> | -7.50 | -7.70 | -7.90  | -7.70 | -8.00  | -      | -7.80 | -8.30 | -7.70 | -7.60 |
| <b>1MQ4</b> | -7.80 | -8.50 | -8.20  | -8.20 | -6.80  | -8.50  | -7.10 | -9.50 | -8.60 | -7.17 |
| <b>1MSO</b> | -5.90 | -6.00 | -6.30  | -6.30 | -6.00  | -5.90  | -5.80 | -6.60 | -6.20 | -6.30 |
| <b>1MV9</b> | -7.80 | -6.90 | -7.90  | -7.20 | -6.80  | -7.10  | -7.30 | -8.20 | -7.20 | -7.20 |
| <b>1MVC</b> | -7.70 | -6.80 | -7.90  | -7.20 | -7.20  | -7.00  | -6.60 | -8.30 | -6.90 | -7.20 |
| <b>1MZN</b> | -6.90 | -7.60 | -8.20  | -6.90 | -7.70  | -6.50  | -6.90 | -7.40 | -7.40 | -6.70 |
| <b>1N4Q</b> | -7.40 | -7.40 | -8.00  | -7.90 | -8.00  | -      | -8.30 | -7.70 | -7.60 | 0.00  |
| <b>1N83</b> | -8.80 | -8.10 | -10.20 | -8.60 | -10.20 | -10.00 | -9.90 | -9.10 | -9.10 | -9.03 |
| <b>1NAX</b> | -7.30 | -8.80 | -8.10  | -7.40 | -7.60  | -7.70  | -7.10 | -7.20 | -7.90 | -8.00 |
| <b>1NCF</b> | -7.00 | -7.00 | -7.00  | -6.90 | -7.10  | -      | -6.70 | -7.70 | -7.30 | -7.20 |
| <b>1NFI</b> | -7.60 | -7.00 | -8.10  | -8.00 | -7.30  | -      | -7.20 | -7.60 | -7.60 | -7.57 |
| <b>1NME</b> | -7.20 | -7.20 | -7.40  | -7.20 | -7.00  | -6.80  | -6.80 | -7.00 | -7.10 | -6.83 |
| <b>1NMQ</b> | -8.20 | -7.80 | -9.30  | -8.60 | -7.10  | -8.00  | -7.20 | -8.00 | -8.00 | -7.23 |



|             |       |       |        |       |       |        |       |       |       |       |
|-------------|-------|-------|--------|-------|-------|--------|-------|-------|-------|-------|
| <b>1NMS</b> | -7.80 | -8.00 | -8.20  | -8.10 | -8.30 | -8.50  | -7.70 | -8.10 | -8.10 | -7.60 |
| <b>1NQL</b> | -7.50 | -6.90 | -7.50  | -7.70 | -7.00 | -      | -6.80 | -7.30 | -6.80 | -6.70 |
| <b>1NRL</b> | -8.40 | -8.30 | -8.80  | -8.20 | -8.20 | -8.50  | -8.70 | -7.60 | -7.90 | -8.40 |
| <b>1NSI</b> | -7.80 | -8.40 | -9.70  | -8.30 | -7.60 | -      | -7.60 | -8.50 | -8.70 | -8.63 |
| <b>1NW9</b> | -6.80 | -6.80 | -7.30  | -6.80 | -7.00 | -6.60  | -6.30 | -6.80 | -7.00 | -6.43 |
| <b>1O8A</b> | -8.90 | -8.90 | -9.20  | -9.10 | -9.00 | -9.20  | -9.00 | -9.20 | -9.20 | -8.70 |
| <b>1OI9</b> | -7.70 | -8.00 | -9.40  | -7.80 | -7.70 | -8.60  | -7.80 | -8.00 | -7.90 | -7.73 |
| <b>1OJ9</b> | -7.70 | -7.50 | -7.70  | -8.00 | -7.50 | -7.70  | -7.20 | -7.50 | -7.60 | -7.30 |
| <b>1OJA</b> | -7.90 | -7.80 | -8.10  | -7.60 | -8.20 | -8.20  | -7.90 | -7.60 | -8.40 | -7.53 |
| <b>1OJC</b> | -8.00 | -8.50 | -7.80  | -8.30 | -7.60 | -7.90  | -7.80 | -7.70 | -8.30 | -7.57 |
| <b>1OL5</b> | -6.90 | -8.50 | -8.80  | -7.60 | -7.80 | -      | -7.70 | -8.70 | -9.40 | -7.80 |
| <b>1OL6</b> | -7.70 | -8.10 | -8.30  | -7.50 | -7.60 | -      | -8.00 | -9.00 | -8.40 | -7.60 |
| <b>1OSF</b> | -7.80 | -7.50 | -7.60  | -7.10 | -7.10 | -7.40  | -7.10 | -7.20 | -7.60 | -7.30 |
| <b>1OVL</b> | -8.30 | -7.90 | -8.30  | -8.30 | -7.70 | -8.40  | -8.10 | -8.70 | -8.50 | -7.97 |
| <b>1P0I</b> | -9.80 | -9.60 | -10.10 | -9.90 | -9.30 | -9.00  | -8.70 | -9.10 | -9.40 | -9.70 |
| <b>1P22</b> | -6.70 | -7.20 | -7.20  | -6.90 | -6.80 | -6.90  | -6.60 | -7.50 | -7.30 | -6.90 |
| <b>1P2S</b> | -7.50 | -7.50 | -7.90  | -7.80 | -7.70 | -7.30  | -7.40 | -7.70 | -7.50 | -7.67 |
| <b>1P8D</b> | -8.50 | -9.20 | -9.50  | -8.60 | -7.80 | -11.00 | -9.30 | -8.90 | -8.80 | -8.37 |
| <b>1P93</b> | -8.10 | -7.30 | -8.80  | -8.20 | -7.80 | -8.70  | -8.60 | -8.00 | -8.30 | -7.57 |
| <b>1PAU</b> | -6.70 | -6.80 | -6.80  | -6.60 | -6.20 | -6.90  | -6.20 | -6.60 | -6.90 | -6.50 |
| <b>1PQ6</b> | -8.00 | -8.50 | -8.90  | -8.20 | -7.90 | -8.20  | -7.90 | -8.60 | -8.50 | -7.80 |

|             |       |       |        |       |       |       |       |       |       |       |
|-------------|-------|-------|--------|-------|-------|-------|-------|-------|-------|-------|
| <b>1PY5</b> | -7.50 | -6.90 | -7.10  | -6.70 | -6.60 | -6.90 | -7.20 | -7.20 | -7.90 | -6.90 |
| <b>1Q5K</b> | -7.70 | -8.40 | -8.30  | -7.70 | -7.60 | -     | -7.30 | -8.90 | -8.20 | -7.77 |
| <b>1QDU</b> | -7.20 | -6.60 | -7.80  | -7.40 | -7.30 | -8.20 | -7.30 | -7.10 | -7.30 | -7.37 |
| <b>1QKU</b> | -7.60 | -7.60 | -8.30  | -7.70 | -7.70 | -8.20 | -7.60 | -7.40 | -7.70 | -7.80 |
| <b>1QQG</b> | -6.90 | -8.00 | -8.30  | -7.20 | -7.60 | -8.60 | -7.40 | -7.50 | -9.20 | -7.20 |
| <b>1QXK</b> | -7.70 | -6.30 | -6.70  | -7.20 | -6.90 | -6.80 | -6.80 | -7.10 | -6.80 | -6.80 |
| <b>1R2D</b> | -7.40 | -7.40 | -7.90  | -7.40 | -6.80 | -7.10 | -6.90 | -6.90 | -7.10 | -7.03 |
| <b>1RE1</b> | -7.40 | -6.70 | -7.20  | -7.20 | -6.90 | -6.90 | -6.80 | -7.00 | -7.10 | -6.60 |
| <b>1RGP</b> | -7.30 | -7.10 | -7.10  | -7.50 | -6.40 | -6.60 | -6.20 | -6.70 | -6.90 | -6.60 |
| <b>1RWW</b> | -7.70 | -6.90 | -7.60  | -7.50 | -7.00 | -7.40 | -7.00 | -7.20 | -6.90 | -7.10 |
| <b>1RY8</b> | -9.70 | -8.20 | -10.00 | -9.90 | -9.00 | -9.80 | -9.00 | -8.90 | -9.60 | -9.53 |
| <b>1S2Q</b> | -7.50 | -7.80 | -7.90  | -7.50 | -7.60 | -7.80 | -8.00 | -7.40 | -7.70 | -7.50 |
| <b>1S2Y</b> | -7.90 | -8.10 | -8.10  | -8.20 | -7.80 | -8.10 | -8.00 | -7.80 | -8.10 | -7.67 |
| <b>1S3B</b> | -7.80 | -7.90 | -8.10  | -8.10 | -7.80 | -8.10 | -7.80 | -7.80 | -8.20 | -7.80 |
| <b>1S3E</b> | -7.70 | -8.10 | -8.00  | -7.80 | -7.80 | -8.00 | -7.90 | -7.30 | -8.10 | -7.50 |
| <b>1S3X</b> | -6.70 | -7.20 | -8.30  | -6.60 | -6.90 | -7.90 | -7.80 | -6.80 | -7.50 | -7.00 |
| <b>1S70</b> | -8.50 | -7.70 | -8.50  | -8.20 | -7.60 | -8.30 | -7.60 | -8.80 | -7.80 | -7.73 |
| <b>1S9V</b> | 0.00  | 0.00  | 0.00   | 0.00  | 0.00  | 0.00  | 0.00  | 0.00  | 0.00  | 0.00  |
| <b>1SAC</b> | -7.20 | -7.00 | -7.30  | -7.00 | -6.90 | -7.20 | -7.10 | -7.70 | -7.50 | -7.00 |
| <b>1SJ0</b> | -7.40 | -6.80 | -7.10  | -7.70 | -7.00 | -6.70 | -6.70 | -6.90 | -7.20 | -7.53 |
| <b>1SM2</b> | -7.40 | -7.80 | -7.80  | -7.20 | -7.60 | -     | -7.30 | -7.90 | -7.50 | -6.87 |

|             |       |       |       |       |       |       |       |       |       |       |
|-------------|-------|-------|-------|-------|-------|-------|-------|-------|-------|-------|
| <b>1SQN</b> | -7.30 | -9.00 | -8.60 | -7.40 | -8.30 | -7.70 | -7.70 | -8.30 | -8.80 | -7.93 |
| <b>1SR7</b> | -7.80 | -8.10 | -8.90 | -7.20 | -7.80 | -8.40 | -8.90 | -6.90 | -8.30 | -8.23 |
| <b>1SVC</b> | -6.50 | -6.50 | -6.90 | -6.50 | -6.30 | -7.00 | -6.20 | -6.80 | -6.50 | -6.20 |
| <b>1T64</b> | -7.40 | -7.60 | -7.90 | -7.20 | -7.30 | -7.50 | -7.20 | -7.50 | -7.60 | -7.80 |
| <b>1T67</b> | -6.60 | -6.40 | -6.70 | -6.60 | -6.50 | -6.70 | -6.90 | -7.20 | -6.50 | -6.97 |
| <b>1T69</b> | -6.50 | -6.60 | -6.70 | -6.40 | -6.90 | -6.60 | -6.50 | -6.80 | -6.70 | -6.53 |
| <b>1T7H</b> | -5.20 | -5.50 | -5.50 | -5.40 | -5.10 | -5.20 | -5.00 | -5.60 | -5.80 | -5.40 |
| <b>1TB6</b> | -8.50 | -7.70 | -9.10 | -7.80 | -8.00 | -7.70 | -8.20 | -7.60 | -8.00 | -7.97 |
| <b>1THA</b> | -6.20 | -6.00 | -6.30 | -6.20 | -5.60 | -6.40 | -5.70 | -5.90 | -6.40 | -6.00 |
| <b>1TNF</b> | -7.00 | -7.60 | -7.20 | -7.00 | -7.80 | -8.60 | -8.00 | -6.70 | -7.60 | -8.00 |
| <b>1TOU</b> | -9.70 | -9.20 | -8.50 | -9.90 | -8.00 | -8.80 | -8.30 | -9.00 | -8.40 | -8.10 |
| <b>1TQN</b> | -8.70 | -9.50 | -8.90 | -8.60 | -8.60 | -9.10 | -8.40 | -9.40 | -9.90 | -8.60 |
| <b>1TW6</b> | -6.80 | -7.40 | -7.20 | -6.90 | -6.80 | -7.80 | -7.30 | -6.90 | -7.00 | -7.00 |
| <b>1U4D</b> | -7.60 | -8.60 | -8.50 | -7.50 | -7.20 | -8.00 | -7.90 | -9.30 | -8.10 | -7.33 |
| <b>1UHL</b> | -8.90 | -8.10 | -9.90 | -8.70 | -8.30 | -9.00 | -8.70 | -8.30 | -8.50 | -8.90 |
| <b>1UNL</b> | -6.80 | -7.50 | -9.10 | -6.80 | -6.70 | -7.90 | -7.00 | -7.20 | -7.70 | -6.93 |
| <b>1UOM</b> | -7.30 | -6.90 | -8.00 | -7.00 | -6.60 | -7.00 | -6.40 | -7.20 | -7.10 | -7.47 |
| <b>1UOU</b> | -6.50 | -7.30 | -6.80 | -6.60 | -6.40 | -7.20 | -6.90 | -6.50 | -6.90 | -6.83 |
| <b>1UPK</b> | -7.10 | -7.10 | -7.20 | -6.90 | -6.70 | -     | -6.60 | -6.80 | -7.00 | -7.10 |
| <b>1US0</b> | -7.90 | -7.70 | -8.90 | -7.90 | -7.80 | -7.30 | -7.40 | -7.30 | -8.00 | -7.50 |
| <b>1UV5</b> | -7.40 | -8.60 | -8.50 | -7.30 | -7.00 | -7.40 | -6.90 | -9.60 | -8.90 | -7.40 |

|             |       |        |       |       |       |        |       |       |        |       |
|-------------|-------|--------|-------|-------|-------|--------|-------|-------|--------|-------|
| <b>1UY6</b> | -8.80 | -9.70  | -9.20 | -8.80 | -7.90 | -7.60  | -7.60 | -7.80 | -9.10  | -7.73 |
| <b>1UY7</b> | -8.90 | -7.70  | -9.70 | -9.00 | -8.10 | -8.10  | -7.70 | -8.10 | -10.10 | -7.93 |
| <b>1UY8</b> | -8.80 | -8.60  | -9.20 | -9.00 | -7.90 | -7.30  | -7.50 | -8.00 | -9.60  | -7.93 |
| <b>1UY9</b> | -8.90 | -10.00 | -9.40 | -9.00 | -7.90 | -7.10  | -7.70 | -7.90 | -9.80  | -7.83 |
| <b>1UYC</b> | -8.80 | -9.90  | -9.50 | -9.00 | -7.60 | -7.10  | -7.60 | -7.90 | -9.70  | -8.00 |
| <b>1UYD</b> | -8.80 | -9.70  | -9.30 | -9.00 | -7.60 | -8.00  | -7.60 | -7.80 | -8.30  | -7.67 |
| <b>1UYE</b> | -8.90 | -9.30  | -9.30 | -8.90 | -7.40 | -8.10  | -7.60 | -7.60 | -9.80  | -7.70 |
| <b>1UYF</b> | -8.80 | -7.80  | -9.20 | -9.00 | -7.50 | -8.00  | -7.50 | -7.70 | -9.00  | -7.63 |
| <b>1UYG</b> | -9.10 | -8.00  | -8.50 | -9.30 | -7.30 | -7.10  | -7.30 | -7.50 | -8.10  | -7.60 |
| <b>1UYH</b> | -8.40 | -7.80  | -8.90 | -9.00 | -7.30 | -7.00  | -7.20 | -8.10 | -8.60  | -7.70 |
| <b>1UYI</b> | -8.80 | -7.80  | -8.80 | -8.80 | -7.20 | -7.30  | -7.50 | -7.30 | -7.80  | -7.90 |
| <b>1UYK</b> | -8.90 | -8.00  | -9.20 | -9.00 | -7.60 | -8.00  | -7.40 | -8.00 | -9.30  | -7.67 |
| <b>1UYM</b> | -8.60 | -9.50  | -9.00 | -8.60 | -7.50 | -8.10  | -7.40 | -7.80 | -9.60  | -7.63 |
| <b>1V04</b> | -8.80 | -8.80  | -8.50 | -8.70 | -9.40 | -10.10 | -9.50 | -8.60 | -8.70  | -8.53 |
| <b>1V4S</b> | -8.50 | -8.10  | -8.40 | -8.50 | -8.40 | -8.20  | -7.70 | -7.60 | -8.20  | -8.20 |
| <b>1VGE</b> | -7.30 | -7.30  | -7.70 | -7.60 | -7.80 | -7.00  | -7.40 | -7.20 | -7.50  | -7.50 |
| <b>1W22</b> | -8.20 | -7.30  | -8.70 | -7.70 | -8.20 | -7.60  | -7.00 | -7.60 | -8.00  | -8.67 |
| <b>1WBN</b> | -8.20 | -8.20  | -8.20 | -8.20 | -8.20 | -8.30  | -7.80 | -8.20 | -8.30  | -7.93 |
| <b>1WDZ</b> | -7.80 | -7.40  | -7.60 | -7.90 | -6.70 | -7.00  | -7.80 | -7.40 | -7.50  | -6.90 |
| <b>1WKW</b> | -7.70 | -8.70  | -9.00 | -8.00 | -7.40 | -7.50  | -7.10 | -7.50 | -8.20  | -8.73 |
| <b>1X78</b> | -7.20 | -7.50  | -8.50 | -7.00 | -7.10 | -7.10  | -7.40 | -7.50 | -7.90  | -7.10 |

|             |       |       |       |       |       |       |       |       |       |       |
|-------------|-------|-------|-------|-------|-------|-------|-------|-------|-------|-------|
| <b>1X7E</b> | -9.00 | -7.80 | -8.70 | -9.70 | -7.80 | -8.40 | -8.10 | -7.60 | -8.20 | -8.37 |
| <b>1XAP</b> | -7.50 | -7.00 | -7.20 | -7.30 | -7.20 | -6.80 | -6.50 | -7.50 | -7.80 | -7.10 |
| <b>1XB7</b> | -7.10 | -7.00 | -6.60 | -6.80 | -7.30 | -7.10 | -6.60 | -6.30 | -7.00 | -6.97 |
| <b>1XJD</b> | -7.00 | -8.40 | -7.80 | -6.90 | -6.80 | -7.80 | -7.60 | -9.10 | -8.00 | -7.10 |
| <b>1XTS</b> | -8.00 | -7.90 | -8.30 | -8.10 | -6.40 | -6.70 | -7.00 | -7.50 | -6.50 | -6.80 |
| <b>1XZX</b> | -7.70 | -7.80 | -7.50 | -7.40 | -7.20 | -7.80 | -7.10 | -8.10 | -7.80 | -7.50 |
| <b>1Y0X</b> | -7.30 | -7.10 | -7.60 | -7.30 | -7.30 | -7.70 | -7.00 | -7.30 | -7.30 | -7.67 |
| <b>1Y2O</b> | -7.60 | -7.20 | -7.60 | -7.90 | -7.10 | -7.60 | -7.80 | -7.40 | -7.10 | -7.70 |
| <b>1Y57</b> | -7.30 | -7.60 | -7.80 | -7.60 | -7.60 | -7.70 | -6.80 | -8.20 | -7.40 | -7.13 |
| <b>1YC3</b> | -7.60 | -7.60 | -7.50 | -7.60 | -6.80 | -7.60 | -6.40 | -6.50 | -6.60 | -7.03 |
| <b>1YET</b> | -7.50 | -7.60 | -7.30 | -7.80 | -7.10 | -7.20 | -7.00 | -7.60 | -7.40 | -7.10 |
| <b>1YK1</b> | -8.10 | -7.90 | -8.70 | -8.10 | -8.60 | -7.90 | -7.60 | -8.20 | -8.70 | -7.83 |
| <b>1YOK</b> | -9.00 | -8.80 | -8.70 | -9.30 | -8.80 | -8.30 | -8.50 | -9.10 | -8.20 | -8.70 |
| <b>1YRP</b> | -9.20 | -8.40 | -9.10 | -9.30 | -9.10 | -8.80 | -8.70 | -8.60 | -8.90 | -9.00 |
| <b>1YTV</b> | -9.50 | -9.90 | -9.80 | -9.40 | -8.50 | -9.30 | -9.00 | -9.90 | -8.90 | -8.77 |
| <b>1YWN</b> | -7.30 | -6.90 | -7.60 | -6.90 | -6.90 | -7.30 | -7.30 | -7.50 | -6.80 | -7.10 |
| <b>1YWT</b> | -7.80 | -7.40 | -7.30 | -7.80 | -7.40 | -7.20 | -7.20 | -7.40 | -7.70 | -7.30 |
| <b>1Z2C</b> | -7.00 | -7.30 | -7.60 | -7.20 | -7.20 | -7.60 | -7.20 | -7.40 | -6.90 | -7.73 |
| <b>1Z57</b> | -7.60 | -8.10 | -9.80 | -7.60 | -7.30 | -     | -7.70 | -9.50 | -9.00 | -7.13 |
| <b>1Z6T</b> | -8.00 | -8.10 | -9.00 | -8.80 | -8.00 | -9.20 | -8.30 | -8.00 | -8.40 | -8.20 |
| <b>1Z7J</b> | -6.40 | -7.30 | -7.20 | -6.80 | -6.20 | -7.00 | -6.70 | -6.90 | -7.10 | -6.80 |

|             |       |       |       |       |       |       |       |       |       |       |
|-------------|-------|-------|-------|-------|-------|-------|-------|-------|-------|-------|
| <b>1ZGY</b> | -7.30 | -8.50 | -8.90 | -8.70 | -8.40 | -8.50 | -7.60 | -9.10 | -8.70 | -9.00 |
| <b>1ZHM</b> | -8.20 | -7.40 | -7.70 | -8.30 | -7.10 | -7.70 | -7.60 | -7.40 | -7.50 | -6.93 |
| <b>1ZUC</b> | -7.70 | -7.70 | -7.90 | -7.70 | -8.60 | -7.50 | -7.90 | -7.40 | -8.40 | -8.17 |
| <b>1ZUQ</b> | -7.00 | -6.40 | -7.00 | -6.90 | -6.80 | -6.60 | -6.60 | -6.90 | -6.50 | -6.80 |
| <b>1ZXC</b> | -7.70 | -7.20 | -8.50 | -7.40 | -7.20 | -     | -8.20 | -7.80 | -7.50 | -8.07 |
| <b>1ZXM</b> | -8.30 | -8.20 | -9.60 | -9.00 | -8.70 | -8.60 | -9.30 | -8.70 | -8.70 | -8.60 |
| <b>1ZYJ</b> | -7.50 | -7.60 | -7.80 | -7.70 | -7.40 | -7.30 | -7.30 | -8.30 | -7.80 | -7.50 |
| <b>1ZYS</b> | -7.20 | -7.80 | -7.80 | -7.10 | -7.40 | -     | -7.40 | -7.30 | -7.70 | -7.50 |
| <b>2A19</b> | -7.80 | -7.80 | -8.60 | -7.80 | -7.50 | -7.30 | -7.50 | -8.20 | -7.90 | -7.53 |
| <b>2A1A</b> | -7.70 | -7.20 | -7.90 | -7.80 | -7.50 | -7.50 | -7.70 | -7.80 | -7.60 | -7.70 |
| <b>2ATX</b> | -7.00 | -6.80 | -7.00 | -6.80 | -6.80 | -7.00 | -6.80 | -6.90 | -7.10 | -6.77 |
| <b>2AZ5</b> | -8.70 | -8.10 | -8.60 | -8.80 | -7.60 | -     | -7.90 | -8.30 | -8.20 | -7.97 |
| <b>2B0Y</b> | -5.60 | -5.80 | -5.60 | -5.70 | -5.40 | -6.30 | -5.20 | -6.10 | -5.30 | -5.70 |
| <b>2B7A</b> | -6.70 | -6.80 | -7.50 | -7.00 | -7.70 | -     | -7.70 | -7.00 | -7.30 | -7.13 |
| <b>2BAW</b> | -7.90 | -7.30 | -8.10 | -8.30 | -7.70 | -7.50 | -8.30 | -7.80 | -7.80 | -7.23 |
| <b>2BEL</b> | -8.70 | -8.80 | -9.30 | -9.10 | -9.30 | -9.20 | -8.90 | -9.10 | -9.10 | -9.00 |
| <b>2BGD</b> | -6.60 | -6.70 | -7.10 | -6.80 | -6.60 | -6.80 | -6.90 | -6.70 | -6.60 | -6.80 |
| <b>2BGE</b> | -6.90 | -6.70 | -6.60 | -7.00 | -6.70 | -6.90 | -6.30 | -6.80 | -6.60 | -6.50 |
| <b>2BIT</b> | -6.20 | -6.40 | -6.60 | -6.30 | -6.10 | -7.10 | -6.70 | -6.30 | -6.20 | -6.43 |
| <b>2BK3</b> | -7.60 | -7.70 | -7.80 | -7.50 | -7.60 | -7.90 | -7.90 | -7.80 | -8.00 | -7.50 |
| <b>2BOH</b> | -8.00 | -8.40 | -7.90 | -8.40 | -7.40 | -7.50 | -7.10 | -7.70 | -7.30 | -8.33 |

|             |       |       |       |       |       |       |       |       |       |       |
|-------------|-------|-------|-------|-------|-------|-------|-------|-------|-------|-------|
| <b>2BSM</b> | -6.80 | -6.20 | -7.60 | -6.90 | -6.20 | -6.60 | -5.80 | -6.30 | -6.40 | -6.33 |
| <b>2BT0</b> | -8.20 | -8.00 | -8.00 | -7.80 | -7.80 | -8.20 | -7.70 | -8.30 | -8.00 | -8.17 |
| <b>2BUJ</b> | -7.60 | -7.40 | -7.30 | -7.50 | -7.10 | -7.30 | -7.10 | -7.90 | -7.50 | -7.70 |
| <b>2BVR</b> | -7.70 | -7.70 | -7.20 | -7.80 | -8.50 | -7.60 | -7.40 | -7.10 | -7.70 | -7.90 |
| <b>2BYB</b> | -7.70 | -7.80 | -8.20 | -8.00 | -7.70 | -8.00 | -7.50 | -8.00 | -8.00 | -7.53 |
| <b>2BYH</b> | -7.20 | -7.10 | -7.40 | -7.50 | -6.80 | -6.90 | -6.50 | -7.40 | -6.70 | -6.63 |
| <b>2BYI</b> | -7.30 | -7.20 | -7.40 | -7.20 | -6.70 | -8.20 | -7.00 | -7.30 | -7.80 | -7.13 |
| <b>2BZ5</b> | -7.80 | -7.50 | -7.60 | -7.60 | -7.30 | -7.80 | -7.60 | -8.20 | -7.90 | -7.67 |
| <b>2C64</b> | -7.60 | -7.80 | -8.10 | -7.80 | -7.40 | -7.60 | -7.80 | -7.50 | -7.90 | -7.70 |
| <b>2C65</b> | -7.40 | -7.90 | -8.10 | -8.10 | -7.80 | -8.00 | -7.90 | -7.70 | -8.10 | -7.57 |
| <b>2C66</b> | -7.40 | -7.70 | -8.00 | -7.80 | -7.80 | -7.90 | -7.60 | -7.80 | -7.80 | -7.57 |
| <b>2C67</b> | -7.90 | -7.40 | -8.00 | -7.70 | -7.80 | -7.90 | -7.80 | -7.80 | -7.70 | -7.57 |
| <b>2C70</b> | -7.80 | -7.40 | -8.00 | -8.00 | -7.50 | -7.90 | -7.80 | -7.60 | -7.80 | -7.60 |
| <b>2CBZ</b> | -7.20 | -6.80 | -7.50 | -7.60 | -7.10 | -6.60 | -7.50 | -6.80 | -7.10 | -6.80 |
| <b>2CCS</b> | -6.80 | -6.30 | -7.60 | -6.90 | -6.30 | -6.70 | -6.10 | -6.50 | -6.50 | -6.10 |
| <b>2CCT</b> | -6.90 | -6.40 | -7.30 | -6.90 | -6.30 | -6.80 | -6.20 | -6.50 | -6.60 | -6.43 |
| <b>2CCU</b> | -6.70 | -6.60 | -6.70 | -6.80 | -6.30 | -6.60 | -6.40 | -6.50 | -7.00 | -6.63 |
| <b>2CEO</b> | -7.30 | -7.80 | -7.40 | -7.30 | -7.70 | -7.40 | -7.40 | -7.60 | -7.60 | -7.80 |
| <b>2CKE</b> | -8.20 | -7.90 | -8.50 | -8.30 | -8.30 | -8.40 | -8.30 | -7.90 | -8.70 | -8.53 |
| <b>2D0T</b> | -8.00 | -8.10 | -8.90 | -8.00 | -7.90 | -8.20 | -8.40 | -8.10 | -8.20 | -8.40 |
| <b>2DUX</b> | -7.70 | -7.80 | -8.00 | -7.70 | -7.60 | -7.50 | -6.90 | -7.40 | -7.90 | -8.00 |

|             |       |       |       |       |       |       |       |       |       |       |
|-------------|-------|-------|-------|-------|-------|-------|-------|-------|-------|-------|
| <b>2E0T</b> | -6.40 | -6.60 | -6.50 | -6.40 | -5.90 | -6.30 | -5.70 | -6.40 | -6.70 | -6.40 |
| <b>2EB3</b> | -7.00 | -6.90 | -7.50 | -7.00 | -7.60 | -     | -7.00 | -7.60 | -7.10 | -7.60 |
| <b>2EFK</b> | -6.50 | -6.40 | -6.40 | -6.70 | -6.00 | -6.50 | -6.10 | -6.30 | -6.90 | -6.27 |
| <b>2EVW</b> | -7.00 | -6.50 | -7.10 | -7.00 | -7.10 | -6.80 | -6.50 | -7.30 | -6.90 | -7.50 |
| <b>2F70</b> | -7.40 | -6.70 | -6.90 | -7.30 | -6.80 | -6.80 | -7.30 | -6.50 | -7.00 | -6.70 |
| <b>2F71</b> | -7.10 | -6.70 | -6.90 | -7.00 | -6.60 | -6.90 | -6.60 | -6.70 | -6.90 | -6.63 |
| <b>2FDA</b> | -7.90 | -7.60 | -7.90 | -8.10 | -7.00 | -7.30 | -7.10 | -7.80 | -7.80 | -7.17 |
| <b>2FDV</b> | -8.00 | -7.70 | -8.20 | -7.70 | -7.40 | -8.00 | -7.70 | -7.90 | -8.20 | -7.40 |
| <b>2FJ5</b> | -5.00 | -5.10 | -5.60 | -5.20 | -5.40 | -5.40 | -4.80 | -5.40 | -5.30 | -5.27 |
| <b>2FV5</b> | -7.10 | -7.50 | -8.00 | -7.30 | -7.90 | -     | -7.60 | -8.00 | -8.30 | -8.13 |
| <b>2FWY</b> | -9.00 | -8.90 | -9.50 | -8.90 | -7.90 | -7.30 | -7.80 | -8.00 | -8.40 | -7.80 |
| <b>2FWZ</b> | -8.50 | -9.40 | -9.40 | -8.60 | -7.70 | -7.10 | -7.90 | -7.70 | -9.70 | -8.00 |
| <b>2G0H</b> | -7.60 | -7.80 | -8.80 | -7.80 | -7.50 | -7.90 | -6.90 | -8.20 | -7.90 | -7.60 |
| <b>2GCP</b> | -6.80 | -7.60 | -8.00 | -7.10 | -6.50 | -6.50 | -6.40 | -6.90 | -6.90 | -7.13 |
| <b>2GL8</b> | -8.30 | -8.30 | -8.70 | -8.60 | -8.40 | -8.10 | -8.60 | -8.00 | -8.10 | -8.37 |
| <b>2GS2</b> | -8.00 | -7.40 | -8.10 | -8.00 | -7.70 | -     | -7.10 | -7.70 | -7.00 | -7.30 |
| <b>2GS6</b> | -8.20 | -7.70 | -8.20 | -8.40 | -7.70 | -7.80 | -7.30 | -8.10 | -7.70 | -7.57 |
| <b>2H55</b> | -8.80 | -7.90 | -9.10 | -8.60 | -8.00 | -7.50 | -7.10 | -7.80 | -9.60 | -7.80 |
| <b>2H77</b> | -8.70 | -7.40 | -7.40 | -8.80 | -7.60 | -6.90 | -6.70 | -7.50 | -7.70 | -7.90 |
| <b>2H79</b> | -8.20 | -7.80 | -8.10 | -8.30 | -7.50 | -7.40 | -7.20 | -8.00 | -7.50 | -7.30 |
| <b>2H7C</b> | -9.00 | -8.70 | -8.70 | -8.60 | -8.60 | -8.80 | -8.90 | -8.50 | -9.00 | -8.50 |



|             |       |       |       |       |       |       |       |       |       |       |
|-------------|-------|-------|-------|-------|-------|-------|-------|-------|-------|-------|
| <b>2H94</b> | -8.70 | -6.70 | -8.10 | -8.20 | -7.50 | -9.20 | -8.40 | -7.30 | -7.60 | -8.00 |
| <b>2HI4</b> | -8.00 | -7.40 | -8.10 | -7.90 | -7.70 | -7.70 | -7.20 | -7.40 | -7.60 | -7.57 |
| <b>2HK5</b> | -7.50 | -7.70 | -8.10 | -7.50 | -7.50 | -6.90 | -6.60 | -7.80 | -8.30 | -7.23 |
| <b>2HKK</b> | -7.30 | -7.30 | -7.50 | -7.50 | -6.90 | -7.40 | -6.60 | -7.00 | -7.10 | -7.27 |
| <b>2HMH</b> | -8.20 | -7.70 | -7.90 | -8.60 | -7.70 | -7.30 | -7.30 | -7.90 | -7.20 | -7.70 |
| <b>2HR7</b> | -7.70 | -7.10 | -7.90 | -8.90 | -7.20 | -7.50 | -7.10 | -7.40 | -7.30 | -7.43 |
| <b>2HWQ</b> | -7.40 | -8.00 | -8.50 | -7.70 | -7.90 | -8.50 | -8.50 | -7.60 | -8.00 | -7.67 |
| <b>2HXL</b> | -7.40 | -7.50 | -7.50 | -7.90 | -7.70 | -8.00 | -7.80 | -7.20 | -8.20 | -7.90 |
| <b>2I47</b> | -7.30 | -7.30 | -8.10 | -7.10 | -7.10 | -     | -7.50 | -7.70 | -7.60 | -7.53 |
| <b>2ITN</b> | -7.20 | -7.50 | -8.30 | -7.90 | -7.40 | -     | -7.20 | -7.70 | -8.20 | -7.50 |
| <b>2ITP</b> | -7.20 | -8.20 | -8.20 | -7.50 | -7.50 | -     | -7.20 | -8.40 | -8.60 | -7.63 |
| <b>2ITU</b> | -7.40 | -7.40 | -8.00 | -7.70 | -6.90 | -     | -7.00 | -7.80 | -7.70 | -7.10 |
| <b>2ITW</b> | -8.70 | -8.20 | -8.60 | -8.50 | -7.90 | -     | -7.10 | -8.10 | -8.10 | -7.60 |
| <b>2ITX</b> | -7.20 | -7.30 | -7.60 | -7.80 | -7.20 | -     | -7.10 | -7.60 | -7.60 | -6.93 |
| <b>2ITZ</b> | -7.00 | -7.60 | -8.30 | -7.20 | -7.00 | -     | -6.80 | -7.60 | -7.90 | -6.80 |
| <b>2J14</b> | -8.10 | -7.80 | -8.10 | -8.00 | -7.90 | -7.80 | -7.50 | -7.70 | -7.80 | -7.30 |
| <b>2J3N</b> | -8.30 | -7.80 | -9.10 | -8.40 | -8.30 | -8.80 | -8.70 | -8.00 | -7.80 | -8.67 |
| <b>2J4I</b> | -8.60 | -8.00 | -7.80 | -8.60 | -7.80 | -7.80 | -7.10 | -7.40 | -7.40 | -8.20 |
| <b>2J8Z</b> | -7.00 | -6.50 | -6.60 | -6.60 | -6.80 | -6.80 | -6.30 | -6.70 | -6.50 | -6.20 |
| <b>2JDF</b> | -7.10 | -6.90 | -7.10 | -7.20 | -6.80 | -6.90 | -7.10 | -7.20 | -6.60 | -6.20 |
| <b>2JF9</b> | -7.40 | -7.20 | -7.80 | -7.30 | -6.80 | -7.30 | -7.20 | -7.10 | -7.00 | -7.27 |

|             |       |       |       |       |       |       |       |       |       |       |
|-------------|-------|-------|-------|-------|-------|-------|-------|-------|-------|-------|
| <b>2JFA</b> | -7.90 | -6.80 | -7.20 | -8.20 | -7.80 | -7.00 | -7.70 | -7.70 | -6.80 | -8.57 |
| <b>2JJC</b> | -6.90 | -6.30 | -6.90 | -7.10 | -6.20 | -6.90 | -6.40 | -6.40 | -6.60 | -6.40 |
| <b>2JJK</b> | -7.60 | -7.90 | -8.40 | -8.20 | -8.20 | -7.60 | -7.40 | -7.80 | -8.10 | -7.83 |
| <b>2JLP</b> | -8.80 | -7.80 | -8.10 | -7.70 | -8.30 | -8.00 | -8.20 | -7.90 | -8.00 | -7.63 |
| <b>2JQ6</b> | -6.70 | -6.60 | -6.80 | -6.40 | -6.30 | -6.30 | -6.40 | -6.70 | -6.60 | -6.30 |
| <b>2KAV</b> | -6.50 | -6.80 | -7.00 | -7.00 | -6.30 | -6.10 | -5.90 | -6.50 | -6.60 | -7.30 |
| <b>2LDC</b> | -3.60 | -3.80 | -3.90 | -3.70 | -4.20 | -4.10 | -3.70 | -3.60 | -4.20 | -3.70 |
| <b>2LWI</b> | -6.90 | -6.90 | -7.10 | -6.60 | -7.10 | -     | -6.90 | -7.20 | -7.00 | -6.60 |
| <b>2NNA</b> | -7.40 | -7.30 | -7.60 | -7.50 | -7.10 | -7.40 | -7.20 | -7.60 | -7.90 | -7.67 |
| <b>2O72</b> | -6.60 | -7.30 | -8.20 | -7.10 | -6.90 | -6.30 | -6.30 | -6.80 | -6.50 | -6.60 |
| <b>2OC2</b> | -9.00 | -8.80 | -8.70 | -8.90 | -8.70 | -9.20 | -8.70 | -9.00 | -9.20 | -8.63 |
| <b>2OJ9</b> | -6.90 | -7.70 | -7.70 | -6.90 | -6.80 | -7.00 | -7.20 | -7.70 | -7.60 | -7.23 |
| <b>2OJI</b> | -7.10 | -7.80 | -8.60 | -7.50 | -8.00 | -7.90 | -7.50 | -8.40 | -8.10 | -7.80 |
| <b>2OJS</b> | -7.40 | -7.10 | -6.90 | -6.90 | -7.30 | -6.70 | -6.30 | -7.00 | -7.10 | -6.97 |
| <b>2OK5</b> | -8.30 | -8.50 | -8.90 | -8.70 | -8.20 | -8.30 | -8.30 | -8.00 | -8.50 | -8.23 |
| <b>2OKK</b> | -7.60 | -7.40 | -8.00 | -7.40 | -7.80 | -7.50 | -7.50 | -7.70 | -7.60 | -7.37 |
| <b>2OL2</b> | -7.90 | -7.50 | -7.70 | -7.80 | -7.60 | -7.80 | -7.50 | -7.50 | -8.00 | -7.77 |
| <b>2OVX</b> | -8.20 | -8.50 | -8.60 | -8.20 | -8.10 | -     | -8.20 | -8.80 | -8.40 | -8.73 |
| <b>2OW1</b> | -8.10 | -8.40 | -8.50 | -8.20 | -8.20 | -     | -8.40 | -8.80 | -8.50 | -9.10 |
| <b>2P33</b> | -7.80 | -7.40 | -7.80 | -7.30 | -7.50 | -7.80 | -7.00 | -8.60 | -8.20 | -7.00 |
| <b>2P3T</b> | -8.20 | -7.70 | -7.80 | -8.10 | -8.00 | -7.90 | -7.30 | -7.50 | -7.40 | -7.40 |

|             |       |       |       |       |       |       |       |       |       |       |
|-------------|-------|-------|-------|-------|-------|-------|-------|-------|-------|-------|
| <b>2P4E</b> | -8.40 | -7.90 | -9.40 | -8.40 | -8.40 | -9.60 | -7.60 | -7.90 | -8.90 | -8.30 |
| <b>2P4I</b> | -7.10 | -7.00 | -8.00 | -7.00 | -6.70 | -7.40 | -7.30 | -7.00 | -6.60 | -6.80 |
| <b>2P55</b> | -7.20 | -6.70 | -8.00 | -7.40 | -7.10 | -8.50 | -7.20 | -7.20 | -8.20 | -7.03 |
| <b>2PD5</b> | -7.40 | -7.60 | -7.30 | -7.50 | -7.20 | -7.80 | -7.10 | -7.10 | -7.70 | -7.53 |
| <b>2PIN</b> | -8.30 | -8.50 | -8.30 | -8.40 | -8.70 | -8.40 | -8.40 | -8.50 | -8.70 | -8.50 |
| <b>2PIV</b> | -7.40 | -6.60 | -7.30 | -7.40 | -6.80 | -7.70 | -6.90 | -6.70 | -7.20 | -6.83 |
| <b>2PIW</b> | -7.30 | -7.90 | -8.20 | -7.30 | -7.00 | -7.60 | -6.80 | -7.00 | -7.40 | -7.30 |
| <b>2PLL</b> | -7.60 | -7.80 | -8.60 | -8.00 | -8.60 | -8.60 | -7.40 | -8.00 | -8.50 | -8.30 |
| <b>2PPL</b> | -7.80 | -7.60 | -7.90 | -7.40 | -6.80 | -8.20 | -7.20 | -7.10 | -8.50 | -7.00 |
| <b>2PQ5</b> | -8.00 | -7.80 | -8.20 | -8.10 | -8.30 | -7.80 | -7.80 | -7.60 | -8.40 | -8.10 |
| <b>2PRG</b> | -8.10 | -8.50 | -8.60 | -8.20 | -7.80 | -     | -7.90 | -8.40 | -8.60 | -8.67 |
| <b>2PVR</b> | -7.70 | -8.30 | -8.60 | -7.40 | -7.10 | -     | -6.90 | -9.20 | -8.10 | -6.80 |
| <b>2Q8E</b> | -7.60 | -7.50 | -7.50 | -7.70 | -7.30 | -7.60 | -7.40 | -8.20 | -8.30 | -7.33 |
| <b>2QFO</b> | -7.20 | -7.60 | -7.40 | -7.50 | -7.50 | -7.80 | -7.90 | -7.80 | -7.20 | -7.30 |
| <b>2QG0</b> | -8.10 | -8.10 | -7.80 | -8.30 | -7.30 | -7.80 | -7.60 | -8.70 | -8.10 | -7.30 |
| <b>2QG2</b> | -8.00 | -7.70 | -7.90 | -7.80 | -7.40 | -7.50 | -7.30 | -7.10 | -7.50 | -7.80 |
| <b>2QKH</b> | -6.90 | -7.40 | -7.50 | -7.00 | -6.90 | -7.60 | -6.50 | -7.10 | -7.20 | -6.97 |
| <b>2QLD</b> | -6.30 | -6.30 | -6.50 | -6.40 | -6.60 | -6.30 | -5.90 | -6.80 | -6.50 | -6.20 |
| <b>2QMG</b> | -6.90 | -7.20 | -7.70 | -6.80 | -7.50 | -7.70 | -6.40 | -8.20 | -7.30 | -7.13 |
| <b>2QOE</b> | -7.90 | -8.00 | -8.00 | -8.00 | -7.70 | -7.60 | -7.80 | -7.70 | -7.80 | -7.70 |
| <b>2QON</b> | -7.50 | -7.10 | -7.50 | -7.80 | -7.20 | -     | -6.90 | -7.20 | -8.00 | -6.93 |

|             |       |       |       |       |       |       |       |       |       |       |
|-------------|-------|-------|-------|-------|-------|-------|-------|-------|-------|-------|
| <b>2QP8</b> | -6.90 | -8.20 | -8.40 | -6.80 | -6.90 | -7.20 | -6.60 | -7.40 | -7.50 | -7.63 |
| <b>2QRV</b> | -6.90 | -6.90 | -7.40 | -6.90 | -7.00 | -7.40 | -7.10 | -7.70 | -7.50 | -7.43 |
| <b>2QU5</b> | -6.80 | -6.50 | -7.00 | -7.10 | -7.20 | -6.90 | -6.60 | -6.70 | -6.90 | -7.20 |
| <b>2QW4</b> | -7.50 | -7.60 | -8.20 | -7.60 | -7.90 | -8.00 | -7.70 | -8.00 | -7.40 | -7.63 |
| <b>2R4B</b> | -6.80 | -7.30 | -7.30 | -6.80 | -6.40 | -     | -7.00 | -6.70 | -6.90 | -6.67 |
| <b>2RB4</b> | -6.80 | -6.70 | -6.80 | -6.70 | -7.30 | -7.00 | -7.60 | -7.30 | -7.10 | -7.50 |
| <b>2RH1</b> | -7.20 | -7.90 | -8.80 | -7.90 | -7.90 | -7.50 | -7.90 | -7.80 | -7.50 | -8.87 |
| <b>2RIP</b> | -8.00 | -7.40 | -7.80 | -7.90 | -7.20 | -8.20 | -7.50 | -7.60 | -7.90 | -7.50 |
| <b>2RIW</b> | -7.00 | -7.30 | -7.70 | -7.00 | -7.20 | -7.80 | -7.10 | -7.00 | -7.00 | -7.13 |
| <b>2RKU</b> | -8.80 | -8.00 | -8.60 | -9.20 | -7.60 | -     | -7.50 | -8.40 | -7.90 | -7.50 |
| <b>2ROX</b> | -6.80 | -7.40 | -7.40 | -6.80 | -6.70 | -7.00 | -6.60 | -7.00 | -7.10 | -7.10 |
| <b>2ROY</b> | -7.30 | -7.20 | -7.00 | -7.10 | -6.30 | -6.70 | -6.50 | -7.00 | -7.00 | -6.97 |
| <b>2UV5</b> | -8.10 | -7.90 | -7.50 | -8.40 | -7.50 | -7.40 | -7.10 | -8.20 | -8.20 | -6.90 |
| <b>2UW9</b> | -7.80 | -8.60 | -9.60 | -7.60 | -8.70 | -     | -7.90 | -7.70 | -8.70 | -8.87 |
| <b>2UWD</b> | -6.90 | -6.70 | -7.70 | -6.80 | -6.20 | -6.80 | -6.30 | -6.50 | -6.70 | -6.80 |
| <b>2V0M</b> | -8.20 | -8.20 | -9.30 | -8.50 | -7.90 | -8.60 | -9.00 | -8.50 | -8.70 | -8.93 |
| <b>2V0V</b> | -7.70 | -7.40 | -8.10 | -7.70 | -6.90 | -8.00 | -7.20 | -7.10 | -7.40 | -7.47 |
| <b>2V5Z</b> | -7.80 | -7.40 | -7.90 | -8.10 | -7.80 | -7.80 | -7.80 | -7.80 | -7.80 | -7.50 |
| <b>2V60</b> | -7.60 | -7.70 | -8.00 | -7.90 | -7.80 | -8.00 | -7.90 | -7.60 | -7.90 | -7.60 |
| <b>2V61</b> | -7.70 | -7.50 | -8.10 | -8.00 | -7.80 | -8.10 | -7.90 | -7.80 | -8.00 | -7.60 |
| <b>2V8Q</b> | -7.70 | -7.70 | -8.10 | -8.30 | -8.20 | -8.30 | -7.90 | -8.00 | -8.30 | -8.40 |

|             |       |       |       |       |       |       |       |       |       |       |
|-------------|-------|-------|-------|-------|-------|-------|-------|-------|-------|-------|
| <b>2VCJ</b> | -6.70 | -6.30 | -6.60 | -6.70 | -6.20 | -6.80 | -6.20 | -6.50 | -6.40 | -6.33 |
| <b>2VPF</b> | -8.10 | -7.40 | -7.80 | -8.10 | -7.50 | -8.50 | -7.80 | -7.60 | -7.50 | -7.73 |
| <b>2VQQ</b> | -8.70 | -9.30 | -9.40 | -7.70 | -8.20 | -8.70 | -8.60 | -8.50 | -8.70 | -8.57 |
| <b>2VRL</b> | -7.60 | -8.10 | -8.00 | -7.90 | -7.70 | -7.80 | -7.40 | -7.60 | -8.30 | -7.47 |
| <b>2VRM</b> | -7.50 | -7.60 | -8.10 | -8.00 | -7.40 | -7.50 | -7.60 | -7.30 | -8.00 | -7.37 |
| <b>2VWI</b> | -7.80 | -7.60 | -8.00 | -8.10 | -8.00 | -9.00 | -7.30 | -7.70 | -8.00 | -7.73 |
| <b>2VXT</b> | -7.60 | -7.00 | -7.20 | -7.70 | -7.20 | -7.70 | -7.20 | -7.00 | -7.20 | -7.27 |
| <b>2W1C</b> | -7.40 | -8.80 | -8.10 | -7.70 | -7.90 | -     | -7.40 | -8.70 | -8.80 | -8.20 |
| <b>2W26</b> | -8.40 | -7.40 | -7.50 | -8.40 | -7.00 | -7.00 | -6.80 | -7.10 | -7.00 | -7.53 |
| <b>2W3L</b> | -8.10 | -8.50 | -9.00 | -8.40 | -8.30 | -8.40 | -8.20 | -8.40 | -8.80 | -7.53 |
| <b>2W5B</b> | -8.50 | -8.30 | -8.20 | -8.30 | -8.60 | -     | -8.30 | -8.50 | -8.30 | -7.70 |
| <b>2W8Y</b> | -6.90 | -8.30 | -8.60 | -7.20 | -8.10 | -8.60 | -8.40 | -7.30 | -8.60 | -8.47 |
| <b>2WEW</b> | -6.40 | -6.70 | -6.90 | -6.60 | -7.00 | -6.90 | -6.60 | -6.60 | -7.00 | -6.70 |
| <b>2WEY</b> | -8.40 | -8.60 | -8.70 | -8.40 | -7.80 | -7.50 | -7.60 | -8.50 | -9.20 | -7.80 |
| <b>2WEZ</b> | -7.40 | -7.30 | -7.00 | -7.20 | -7.10 | -7.40 | -6.60 | -7.50 | -7.20 | -6.87 |
| <b>2WFX</b> | -8.20 | -7.80 | -8.60 | -8.00 | -8.60 | -8.50 | -8.40 | -8.40 | -9.30 | -8.77 |
| <b>2WGJ</b> | -7.50 | -7.70 | -8.10 | -7.50 | -7.20 | -     | -7.40 | -8.80 | -7.60 | -7.33 |
| <b>2WJO</b> | -8.40 | -8.20 | -8.20 | -8.50 | -7.50 | -7.90 | -7.40 | -8.10 | -8.10 | -8.50 |
| <b>2WKM</b> | -8.00 | -8.60 | -8.60 | -8.60 | -7.40 | -     | -8.00 | -8.50 | -8.90 | -7.40 |
| <b>2WRU</b> | -5.80 | -6.00 | -6.70 | -5.90 | -5.40 | -5.70 | -5.50 | -6.30 | -5.90 | -6.00 |
| <b>2WY3</b> | -8.20 | -8.20 | -8.30 | -8.30 | -8.50 | -8.50 | -8.50 | -8.90 | -8.60 | -7.97 |

|             |       |       |       |       |       |       |       |       |       |       |
|-------------|-------|-------|-------|-------|-------|-------|-------|-------|-------|-------|
| <b>2WZO</b> | -6.70 | -6.40 | -6.60 | -6.50 | -6.10 | -6.80 | -6.10 | -6.10 | -6.50 | -5.90 |
| <b>2X0G</b> | -8.10 | -7.60 | -7.80 | -7.90 | -7.50 | -7.90 | -7.40 | -7.90 | -8.10 | -8.03 |
| <b>2X0W</b> | -7.60 | -8.00 | -8.10 | -7.80 | -8.20 | -8.00 | -8.20 | -8.10 | -7.90 | -8.40 |
| <b>2X13</b> | -7.10 | -7.10 | -7.30 | -7.00 | -7.40 | -7.30 | -7.40 | -7.00 | -7.20 | -7.90 |
| <b>2X18</b> | -8.60 | -8.40 | -8.50 | -8.80 | -8.20 | -8.10 | -7.80 | -8.70 | -8.40 | -8.50 |
| <b>2X2L</b> | -6.80 | -6.70 | -7.50 | -6.80 | -6.80 | -7.30 | -6.80 | -7.80 | -6.80 | -7.30 |
| <b>2X39</b> | -9.40 | -8.90 | -9.30 | -9.60 | -9.20 | -9.30 | -9.50 | -9.10 | -9.50 | -8.87 |
| <b>2X4Z</b> | -7.90 | -7.40 | -8.20 | -8.10 | -6.60 | -7.30 | -7.20 | -7.70 | -7.10 | -7.20 |
| <b>2X57</b> | -7.30 | -6.90 | -7.90 | -7.50 | -7.30 | -7.30 | -7.20 | -7.60 | -7.30 | -7.10 |
| <b>2X70</b> | -8.40 | -8.70 | -8.70 | -8.30 | -9.10 | -8.50 | -8.70 | -8.60 | -9.30 | -8.63 |
| <b>2XA0</b> | -7.80 | -7.70 | -8.20 | -7.70 | -8.10 | -8.10 | -7.80 | -7.50 | -8.40 | -8.23 |
| <b>2XAC</b> | -7.10 | -6.70 | -7.40 | -7.40 | -6.70 | -7.00 | -6.60 | -7.10 | -7.50 | -6.83 |
| <b>2XIK</b> | -7.10 | -7.20 | -8.10 | -6.70 | -7.40 | -8.00 | -7.00 | -8.00 | -7.40 | -6.53 |
| <b>2XIR</b> | -8.30 | -8.60 | -9.10 | -8.00 | -8.10 | -8.10 | -8.30 | -8.30 | -8.60 | -8.10 |
| <b>2XK9</b> | -7.50 | -7.10 | -7.20 | -7.00 | -6.60 | -7.10 | -6.90 | -6.90 | -7.20 | -7.13 |
| <b>2XKW</b> | -7.80 | -7.80 | -8.00 | -7.70 | -7.50 | -7.60 | -7.50 | -7.50 | -7.90 | -7.70 |
| <b>2XN6</b> | -7.40 | -7.00 | -7.40 | -6.90 | -6.80 | -7.60 | -6.90 | -7.20 | -7.00 | -6.90 |
| <b>2XN7</b> | -7.40 | -7.40 | -8.40 | -7.30 | -7.20 | -8.10 | -8.70 | -6.70 | -7.90 | -7.03 |
| <b>2XN9</b> | -7.90 | -7.50 | -8.10 | -7.70 | -8.30 | -8.50 | -8.10 | -8.10 | -8.00 | -8.00 |
| <b>2XP2</b> | -7.30 | -7.80 | -7.30 | -7.30 | -6.90 | -     | -6.70 | -7.60 | -7.40 | -6.87 |
| <b>2XRA</b> | -7.80 | -7.70 | -7.60 | -7.70 | -7.60 | -7.80 | -7.60 | -7.60 | -8.10 | -7.37 |

|             |       |       |       |       |       |       |       |       |       |       |
|-------------|-------|-------|-------|-------|-------|-------|-------|-------|-------|-------|
| <b>2XRU</b> | -8.10 | -8.40 | -8.50 | -8.40 | -8.00 | -     | -7.40 | -8.30 | -8.80 | -7.90 |
| <b>2XSI</b> | -8.20 | -7.70 | -8.90 | -8.90 | -7.90 | -8.50 | -7.90 | -8.10 | -8.40 | -8.10 |
| <b>2XU7</b> | -8.60 | -8.80 | -9.20 | -8.90 | -9.00 | -8.90 | -8.80 | -9.10 | -9.50 | -8.80 |
| <b>2XUM</b> | -7.10 | -7.20 | -7.60 | -7.20 | -7.00 | -7.30 | -7.00 | -7.40 | -7.30 | -6.80 |
| <b>2XVT</b> | -8.30 | -8.00 | -8.80 | -8.20 | -8.00 | -8.30 | -7.80 | -9.20 | -8.60 | -8.00 |
| <b>2XYJ</b> | -8.20 | -7.40 | -8.40 | -8.40 | -7.50 | -8.40 | -7.40 | -7.70 | -7.70 | -7.83 |
| <b>2XYW</b> | -7.90 | -8.40 | -8.10 | -7.90 | -7.40 | -8.10 | -8.60 | -7.10 | -9.00 | -9.23 |
| <b>2XYX</b> | -7.20 | -7.70 | -8.30 | -6.90 | -7.80 | -7.70 | -8.00 | -6.60 | -7.90 | -7.57 |
| <b>2XZT</b> | -7.30 | -7.50 | -8.80 | -8.80 | -7.20 | -8.00 | -6.90 | -7.40 | -8.00 | -7.33 |
| <b>2Y1L</b> | -7.90 | -7.70 | -8.50 | -8.00 | -7.50 | -8.00 | -7.90 | -7.70 | -7.70 | -7.40 |
| <b>2Y7X</b> | -8.30 | -7.70 | -7.70 | -8.40 | -7.60 | -7.50 | -7.10 | -7.40 | -7.30 | -7.80 |
| <b>2YDO</b> | -7.40 | -6.80 | -7.60 | -7.10 | -7.00 | -7.30 | -6.70 | -7.60 | -7.10 | -7.33 |
| <b>2YDV</b> | -7.20 | -7.40 | -7.50 | -6.70 | -7.30 | -7.30 | -6.70 | -7.40 | -7.00 | -6.90 |
| <b>2YJA</b> | -7.00 | -8.10 | -8.50 | -7.00 | -6.60 | -6.90 | -6.80 | -6.80 | -6.90 | -6.70 |
| <b>2YJD</b> | -7.00 | -7.00 | -7.30 | -7.30 | -6.80 | -7.20 | -6.80 | -6.80 | -6.90 | -7.13 |
| <b>2YXJ</b> | -8.20 | -7.50 | -7.90 | -8.00 | -7.40 | -7.60 | -7.50 | -7.40 | -7.70 | -7.87 |
| <b>2Z5X</b> | -8.30 | -7.60 | -9.00 | -8.10 | -7.90 | -8.10 | -7.90 | -7.30 | -7.60 | -7.53 |
| <b>2Z5Y</b> | -7.60 | -7.40 | -7.70 | -7.70 | -7.30 | -7.70 | -8.70 | -7.40 | -7.40 | -7.60 |
| <b>2Z6W</b> | -7.10 | -7.50 | -7.30 | -7.20 | -8.10 | -7.30 | -6.90 | -7.70 | -7.80 | -7.10 |
| <b>2ZJW</b> | -7.50 | -7.40 | -8.10 | -7.70 | -7.40 | -7.80 | -7.50 | -8.00 | -7.50 | -7.00 |
| <b>2ZK1</b> | -7.20 | -7.30 | -7.80 | -7.40 | -6.80 | -     | -7.10 | -7.10 | -7.50 | -6.93 |

|             |       |       |       |       |       |        |       |       |       |       |
|-------------|-------|-------|-------|-------|-------|--------|-------|-------|-------|-------|
| <b>2ZZ0</b> | -8.40 | -8.50 | -9.10 | -8.80 | -8.80 | -9.30  | -8.80 | -9.10 | -8.70 | -8.80 |
| <b>3A5J</b> | -7.50 | -7.50 | -6.90 | -7.80 | -7.10 | -7.10  | -7.30 | -7.40 | -7.60 | -7.17 |
| <b>3A60</b> | -7.60 | -7.30 | -7.90 | -7.40 | -7.20 | -      | -7.40 | -7.40 | -7.70 | -7.40 |
| <b>3A62</b> | -6.70 | -7.60 | -8.50 | -6.60 | -7.20 | -7.50  | -7.30 | -8.20 | -7.50 | -6.97 |
| <b>3A8W</b> | -8.70 | -8.50 | -8.50 | -8.40 | -7.60 | -8.10  | -8.30 | -8.20 | -8.80 | -8.23 |
| <b>3AAA</b> | -7.50 | -7.90 | -8.20 | -7.50 | -7.40 | -8.10  | -7.40 | -7.90 | -8.00 | -7.87 |
| <b>3ADS</b> | -8.50 | -7.70 | -8.70 | -7.70 | -7.50 | -8.00  | -8.20 | -7.60 | -8.40 | -8.50 |
| <b>3ADT</b> | -7.60 | -7.10 | -7.90 | -7.50 | -7.50 | -7.10  | -7.70 | -7.00 | -7.80 | -7.57 |
| <b>3AJB</b> | -7.00 | -6.80 | -7.10 | -6.80 | -7.00 | -6.80  | -6.30 | -6.80 | -6.90 | -7.10 |
| <b>3AQQ</b> | -7.00 | -7.10 | -7.00 | -6.90 | -7.10 | -6.90  | -6.90 | -7.50 | -7.70 | -6.83 |
| <b>3AYU</b> | -7.00 | -6.40 | -6.20 | -6.90 | -6.60 | -6.70  | -6.70 | -6.60 | -6.60 | -6.63 |
| <b>3B3I</b> | -8.70 | -9.00 | -8.50 | -8.70 | -9.50 | -8.60  | -8.80 | -8.70 | -8.80 | -8.53 |
| <b>3B3K</b> | -7.20 | -7.10 | -7.80 | -6.90 | -7.40 | -7.90  | -7.40 | -8.90 | -8.40 | -8.07 |
| <b>3BCJ</b> | -7.70 | -7.90 | -7.60 | -7.70 | -7.10 | -7.10  | -6.70 | -7.90 | -8.10 | -7.90 |
| <b>3BEJ</b> | -8.00 | -8.60 | -8.30 | -8.00 | -7.70 | -10.10 | -8.00 | -8.10 | -8.20 | -8.30 |
| <b>3BG8</b> | -8.00 | -7.90 | -7.80 | -8.20 | -7.40 | -7.40  | -7.20 | -8.20 | -7.20 | -7.37 |
| <b>3BM9</b> | -6.80 | -6.20 | -6.80 | -6.70 | -6.30 | -7.30  | -6.20 | -6.40 | -6.70 | -6.53 |
| <b>3BMY</b> | -8.00 | -7.50 | -8.10 | -8.10 | -6.90 | -7.30  | -6.90 | -7.70 | -7.90 | -6.70 |
| <b>3BQD</b> | -7.30 | -7.30 | -7.10 | -7.40 | -7.90 | -7.10  | -7.40 | -6.80 | -6.90 | -7.30 |
| <b>3BQR</b> | -7.50 | -7.60 | -7.30 | -7.40 | -7.80 | -7.90  | -7.40 | -7.70 | -7.70 | -7.60 |
| <b>3BRT</b> | -6.60 | -6.30 | -6.20 | -6.40 | -6.30 | -6.30  | -7.30 | -6.50 | -6.20 | -6.17 |



|             |       |       |        |       |       |       |       |       |       |       |
|-------------|-------|-------|--------|-------|-------|-------|-------|-------|-------|-------|
| <b>3BRV</b> | -6.60 | -6.60 | -6.70  | -7.10 | -6.40 | -6.30 | -6.30 | -6.80 | -6.70 | -6.97 |
| <b>3BTR</b> | -7.90 | -7.20 | -7.60  | -7.80 | -7.20 | -7.20 | -7.10 | -7.40 | -7.90 | -7.10 |
| <b>3BWM</b> | -6.40 | -6.00 | -6.10  | -6.40 | -6.00 | -6.20 | -6.00 | -6.00 | -6.00 | -6.53 |
| <b>3C0Z</b> | -8.50 | -8.00 | -9.10  | -8.40 | -8.20 | -8.10 | -8.30 | -8.30 | -8.60 | -7.83 |
| <b>3C10</b> | -8.60 | -8.30 | -9.20  | -8.80 | -8.30 | -8.40 | -8.30 | -8.40 | -8.70 | -7.70 |
| <b>3C4C</b> | -7.60 | -8.80 | -9.10  | -7.70 | -7.60 | -8.20 | -7.80 | -9.20 | -8.80 | -7.97 |
| <b>3CDP</b> | -7.40 | -8.30 | -8.10  | -7.30 | -7.40 | -9.00 | -7.10 | -8.00 | -8.30 | -7.50 |
| <b>3CDS</b> | -7.10 | -6.70 | -8.60  | -7.30 | -6.90 | -8.40 | -8.10 | -7.70 | -7.60 | -7.23 |
| <b>3CJW</b> | -7.10 | -6.80 | -6.70  | -6.70 | -6.80 | -6.50 | -6.30 | -7.10 | -6.50 | -6.40 |
| <b>3CO6</b> | -7.90 | -8.00 | -8.30  | -8.60 | -8.60 | -8.40 | -8.20 | -8.80 | -8.80 | -7.97 |
| <b>3CQU</b> | -7.00 | -7.00 | -7.70  | -7.00 | -6.70 | -6.80 | -6.30 | -7.10 | -7.00 | -6.77 |
| <b>3D24</b> | -8.50 | -8.60 | -8.40  | -8.00 | -8.00 | -8.20 | -7.80 | -8.90 | -8.60 | -8.43 |
| <b>3D6D</b> | -7.50 | -8.00 | -8.30  | -7.40 | -8.00 | -8.90 | -8.10 | -9.00 | -7.60 | -8.20 |
| <b>3D90</b> | -8.20 | -7.90 | -8.60  | -8.00 | -7.90 | -9.20 | -8.80 | -7.10 | -9.00 | -8.13 |
| <b>3D9I</b> | -7.40 | -8.20 | -8.70  | -7.60 | -7.50 | -7.60 | -7.10 | -8.50 | -8.40 | -7.50 |
| <b>3DEH</b> | -8.20 | -8.00 | -8.60  | -8.60 | -7.70 | -8.30 | -7.40 | -8.10 | -8.00 | -7.47 |
| <b>3DY7</b> | -7.10 | -8.40 | -7.80  | -7.50 | -7.90 | -8.10 | -7.60 | -7.90 | -8.60 | -7.50 |
| <b>3E7G</b> | -7.80 | -8.00 | -10.10 | -7.90 | -7.60 | -     | -7.50 | -8.70 | -8.20 | -8.13 |
| <b>3E8N</b> | -8.30 | -8.20 | -8.20  | -7.90 | -8.50 | -     | -8.00 | -8.40 | -8.40 | -8.13 |
| <b>3EAH</b> | -8.40 | -8.70 | -10.70 | -9.10 | -8.40 | -8.20 | -8.70 | -9.60 | -8.70 | -9.07 |
| <b>3EAX</b> | -7.90 | -7.80 | -8.10  | -7.70 | -7.70 | -7.50 | -7.20 | -8.50 | -8.20 | -7.57 |

|             |       |       |       |       |       |       |       |       |       |       |
|-------------|-------|-------|-------|-------|-------|-------|-------|-------|-------|-------|
| <b>3ECS</b> | -8.40 | -8.00 | -8.60 | -7.80 | -8.00 | -7.80 | -7.80 | -8.10 | -8.30 | -8.33 |
| <b>3EKO</b> | -8.00 | -8.00 | -8.50 | -8.20 | -7.60 | -7.60 | -7.60 | -7.40 | -8.20 | -7.20 |
| <b>3EKR</b> | -7.90 | -7.60 | -7.60 | -7.90 | -7.70 | -8.00 | -7.70 | -7.30 | -8.10 | -7.30 |
| <b>3EML</b> | -7.40 | -7.40 | -7.70 | -7.60 | -6.60 | -7.30 | -7.30 | -8.00 | -7.90 | -6.97 |
| <b>3EO2</b> | -6.30 | -6.70 | -7.00 | -6.40 | -6.70 | -6.80 | -6.30 | -6.30 | -7.20 | -6.40 |
| <b>3EO9</b> | -7.40 | -7.60 | -7.60 | -7.50 | -7.40 | -7.30 | -7.60 | -7.30 | -7.40 | -7.73 |
| <b>3EOX</b> | -6.70 | -6.60 | -6.90 | -6.80 | -6.50 | -7.60 | -6.30 | -6.90 | -6.60 | -6.87 |
| <b>3EQB</b> | -7.30 | -6.90 | -7.90 | -7.30 | -6.80 | -     | -7.00 | -7.40 | -8.00 | -7.00 |
| <b>3EQC</b> | -8.70 | -7.90 | -8.10 | -8.30 | -8.30 | -     | -7.40 | -8.10 | -7.90 | -8.70 |
| <b>3EQH</b> | -8.80 | -8.30 | -8.40 | -8.70 | -8.60 | -     | -8.40 | -8.50 | -8.50 | -8.10 |
| <b>3EQM</b> | -8.30 | -8.10 | -8.40 | -8.40 | -8.50 | -9.40 | -7.80 | -7.60 | -8.50 | -7.90 |
| <b>3ERT</b> | -7.50 | -6.80 | -7.30 | -7.30 | -7.30 | -7.40 | -7.30 | -7.40 | -7.60 | -7.60 |
| <b>3ET3</b> | -7.70 | -8.30 | -7.30 | -7.50 | -7.00 | -7.10 | -7.00 | -8.70 | -8.60 | -7.13 |
| <b>3EW8</b> | -7.10 | -6.90 | -7.10 | -7.00 | -6.80 | -6.80 | -6.40 | -7.00 | -6.80 | -6.60 |
| <b>3EWV</b> | -6.70 | -6.60 | -6.70 | -7.10 | -6.30 | -6.90 | -6.50 | -6.60 | -6.80 | -6.20 |
| <b>3EYG</b> | -6.90 | -7.10 | -7.70 | -6.70 | -6.40 | -7.00 | -7.10 | -7.10 | -7.10 | -6.73 |
| <b>3F07</b> | -7.20 | -8.10 | -7.70 | -7.50 | -7.60 | -8.90 | -8.30 | -7.40 | -7.20 | -7.90 |
| <b>3F17</b> | -6.70 | -7.40 | -7.30 | -7.00 | -7.50 | -     | -7.30 | -7.50 | -7.50 | -8.13 |
| <b>3F6K</b> | -7.40 | -7.20 | -7.80 | -7.60 | -7.30 | -7.30 | -7.20 | -7.50 | -8.30 | -7.30 |
| <b>3F6Q</b> | -6.60 | -6.70 | -6.60 | -6.60 | -6.50 | -6.90 | -6.60 | -6.70 | -6.80 | -7.20 |
| <b>3F88</b> | -7.60 | -8.40 | -8.40 | -8.00 | -7.60 | -8.80 | -7.60 | -9.00 | -8.10 | -7.47 |

|             |       |       |       |       |       |       |       |       |       |       |
|-------------|-------|-------|-------|-------|-------|-------|-------|-------|-------|-------|
| <b>3F8S</b> | -8.30 | -7.80 | -7.80 | -8.40 | -7.30 | -8.60 | -7.60 | -7.90 | -7.80 | -7.63 |
| <b>3FAY</b> | -7.10 | -6.90 | -7.60 | -7.10 | -6.70 | -7.30 | -7.10 | -7.80 | -6.80 | -6.63 |
| <b>3FF8</b> | -7.50 | -7.20 | -7.80 | -7.30 | -7.10 | -     | -7.40 | -7.40 | -7.40 | -7.60 |
| <b>3FGU</b> | -7.30 | -7.00 | -8.40 | -7.50 | -8.00 | -     | -7.90 | -8.10 | -8.10 | -7.73 |
| <b>3FQX</b> | -8.20 | -9.30 | -8.70 | -9.00 | -8.70 | -8.40 | -8.70 | -8.20 | -9.00 | -8.30 |
| <b>3FR0</b> | -8.00 | -7.70 | -7.80 | -7.60 | -8.00 | -7.90 | -8.00 | -7.40 | -8.10 | -7.80 |
| <b>3FT8</b> | -8.30 | -8.70 | -9.50 | -8.80 | -7.00 | -7.50 | -7.40 | -7.70 | -9.20 | -7.80 |
| <b>3G04</b> | -7.40 | -7.60 | -7.50 | -7.40 | -7.30 | -7.60 | -6.90 | -7.50 | -7.90 | -7.23 |
| <b>3G0E</b> | -8.00 | -7.40 | -8.60 | -8.00 | -8.00 | -8.70 | -7.60 | -8.30 | -8.40 | -7.77 |
| <b>3G42</b> | -7.30 | -7.50 | -8.20 | -7.30 | -7.40 | -     | -8.00 | -8.00 | -7.50 | -7.80 |
| <b>3G9E</b> | -7.90 | -7.80 | -7.90 | -7.70 | -7.00 | -7.80 | -7.60 | -7.70 | -8.00 | -7.80 |
| <b>3GCW</b> | -7.30 | -6.80 | -7.20 | -7.10 | -7.80 | -7.20 | -7.50 | -7.20 | -8.70 | -7.37 |
| <b>3GGF</b> | -7.50 | -7.60 | -8.10 | -7.60 | -7.30 | -7.20 | -7.30 | -8.50 | -8.10 | -7.23 |
| <b>3GOI</b> | -8.50 | -7.90 | -8.20 | -8.70 | -8.20 | -7.90 | -7.70 | -8.00 | -8.40 | -7.40 |
| <b>3GWS</b> | -7.60 | -6.90 | -7.50 | -7.80 | -7.10 | -7.70 | -7.40 | -7.70 | -7.70 | -7.30 |
| <b>3GWX</b> | -7.40 | -7.80 | -8.10 | -7.80 | -7.00 | -7.90 | -7.90 | -7.90 | -7.70 | -7.77 |
| <b>3GZ9</b> | -8.10 | -7.80 | -8.00 | -8.40 | -7.60 | -8.00 | -7.00 | -7.50 | -7.50 | -7.13 |
| <b>3H1V</b> | -7.70 | -8.50 | -8.00 | -7.80 | -7.70 | -7.60 | -7.30 | -7.90 | -8.90 | -9.17 |
| <b>3HDN</b> | -7.10 | -7.70 | -8.10 | -7.60 | -7.80 | -9.10 | -6.80 | -8.80 | -8.30 | -7.43 |
| <b>3HGZ</b> | -8.00 | -7.70 | -8.70 | -8.00 | -7.60 | -8.20 | -8.40 | -8.00 | -7.90 | 0.00  |
| <b>3HHU</b> | -7.90 | -7.80 | -7.90 | -8.00 | -7.40 | -7.70 | -7.40 | -7.80 | -7.80 | -7.83 |

|             |       |       |       |       |       |       |       |       |       |       |
|-------------|-------|-------|-------|-------|-------|-------|-------|-------|-------|-------|
| <b>3HNG</b> | -7.60 | -7.20 | -7.40 | -7.90 | -8.20 | -8.00 | -8.20 | -7.50 | -7.80 | -7.73 |
| <b>3HOD</b> | -7.60 | -7.50 | -8.10 | -7.70 | -7.70 | -8.10 | -7.70 | -7.70 | -8.30 | -7.37 |
| <b>3HOK</b> | -8.20 | -7.90 | -8.70 | -8.50 | -8.30 | -8.00 | -7.50 | -7.90 | -8.30 | -8.70 |
| <b>3HXG</b> | -7.90 | -8.00 | -7.60 | -7.80 | -7.80 | -8.30 | -7.70 | -8.20 | -8.40 | -7.30 |
| <b>3IAI</b> | -9.20 | -8.80 | -8.90 | -9.40 | -9.10 | -8.80 | -8.40 | -9.20 | -9.10 | -8.70 |
| <b>3IEO</b> | -7.00 | -7.10 | -7.20 | -7.20 | -7.00 | -7.70 | -6.80 | -6.90 | -7.00 | -7.30 |
| <b>3IIT</b> | -8.30 | -8.10 | -8.00 | -8.20 | -7.60 | -7.40 | -7.00 | -7.80 | -7.10 | -8.43 |
| <b>3IJE</b> | -9.00 | -7.80 | -8.70 | -8.90 | -7.90 | -8.90 | -8.00 | -8.00 | -7.80 | -8.33 |
| <b>3ILZ</b> | -8.40 | -7.50 | -8.20 | -8.30 | -6.90 | -8.20 | -7.40 | -7.70 | -8.30 | -7.30 |
| <b>3IMX</b> | -7.80 | -7.90 | -8.90 | -8.00 | -8.00 | -8.60 | -8.80 | -8.90 | -8.50 | -7.60 |
| <b>3INH</b> | -8.50 | -7.90 | -8.10 | -8.90 | -7.90 | -7.90 | -8.00 | -7.60 | -8.10 | -8.37 |
| <b>3IOL</b> | -6.90 | -7.10 | -7.10 | -6.60 | -6.30 | -6.90 | -7.20 | -6.90 | -7.20 | -6.87 |
| <b>3IPB</b> | -6.90 | -6.70 | -7.20 | -7.20 | -6.50 | -7.00 | -6.40 | -7.60 | -6.80 | -6.37 |
| <b>3IPS</b> | -8.40 | -8.20 | -9.00 | -8.10 | -7.70 | -8.00 | -7.60 | -8.10 | -8.00 | -7.80 |
| <b>3J0A</b> | -7.30 | -7.20 | -8.00 | -7.30 | -8.60 | -     | -7.70 | -7.30 | -7.20 | -7.53 |
| <b>3JRW</b> | -7.50 | -7.50 | -8.00 | -7.30 | -7.40 | -7.30 | -7.40 | -7.60 | -7.80 | -7.67 |
| <b>3JS2</b> | -7.90 | -7.90 | -8.50 | -8.00 | -7.90 | -8.50 | -7.60 | -8.40 | -8.40 | -7.90 |
| <b>3JUI</b> | -7.10 | -7.90 | -8.40 | -7.00 | -6.60 | -7.60 | -7.30 | -7.80 | -8.20 | -7.20 |
| <b>3JXU</b> | -7.40 | -7.30 | -8.10 | -7.50 | -8.00 | -8.20 | -7.60 | -8.70 | -7.90 | -7.90 |
| <b>3JZC</b> | -7.50 | -7.70 | -7.50 | -7.30 | -7.20 | -7.40 | -6.90 | -7.20 | -7.40 | -7.20 |
| <b>3K6P</b> | -7.40 | -6.60 | -6.70 | -7.30 | -6.70 | -6.70 | -6.20 | -7.00 | -6.70 | -6.70 |

|             |       |       |       |       |       |       |       |       |       |       |
|-------------|-------|-------|-------|-------|-------|-------|-------|-------|-------|-------|
| <b>3K97</b> | -7.80 | -7.70 | -7.30 | -7.80 | -7.10 | -7.30 | -7.30 | -7.50 | -7.20 | -6.93 |
| <b>3KCG</b> | -8.00 | -7.80 | -8.50 | -8.10 | -7.90 | -8.10 | -7.70 | -8.30 | -8.30 | -7.87 |
| <b>3KEK</b> | -6.90 | -7.30 | -7.60 | -7.20 | -7.80 | -6.90 | -6.70 | -6.90 | -7.80 | -7.17 |
| <b>3KIJ</b> | -7.30 | -7.60 | -8.00 | -7.40 | -7.10 | -7.60 | -8.00 | -7.60 | -7.80 | -7.20 |
| <b>3KMC</b> | -7.50 | -7.10 | -7.80 | -7.40 | -7.40 | -     | -7.50 | -8.20 | -7.30 | -8.07 |
| <b>3KPJ</b> | -7.80 | -7.40 | -8.00 | -7.80 | -7.20 | -7.40 | -6.90 | -6.80 | -7.50 | -6.63 |
| <b>3KQR</b> | -7.10 | -7.10 | -7.50 | -6.70 | -7.20 | -7.20 | -7.40 | -7.60 | -7.30 | -7.33 |
| <b>3KRW</b> | -7.70 | -7.20 | -7.70 | -8.00 | -8.10 | -9.00 | -8.20 | -8.10 | -8.00 | -8.00 |
| <b>3KVV</b> | -7.90 | -8.50 | -9.70 | -8.00 | -7.60 | -8.00 | -7.40 | -9.30 | -8.50 | -7.10 |
| <b>3KWA</b> | -7.30 | -6.70 | -7.40 | -7.30 | -6.70 | -7.00 | -6.70 | -6.80 | -7.10 | -7.30 |
| <b>3KYT</b> | -8.50 | -8.10 | -9.10 | -8.00 | -7.70 | -9.70 | -9.20 | -7.70 | -8.30 | -8.30 |
| <b>3L0J</b> | -8.60 | -8.10 | -8.50 | -8.40 | -9.00 | -9.00 | -8.50 | -7.70 | -8.80 | -9.10 |
| <b>3L0L</b> | -9.00 | -8.80 | -9.10 | -8.70 | -9.70 | -9.00 | -9.00 | -9.00 | -9.00 | -9.10 |
| <b>3L0V</b> | -7.40 | -7.30 | -7.80 | -7.50 | -7.40 | -     | -7.90 | -8.00 | -7.30 | -7.60 |
| <b>3L2Y</b> | -7.30 | -7.20 | -7.90 | -7.90 | -7.80 | -8.20 | -7.40 | -7.30 | -7.60 | -7.50 |
| <b>3L3X</b> | -7.20 | -7.10 | -7.20 | -7.20 | -7.00 | -7.50 | -6.70 | -7.30 | -7.40 | -7.37 |
| <b>3L4W</b> | -7.70 | -7.60 | -8.10 | -7.70 | -8.00 | -7.40 | -7.50 | -8.10 | -7.80 | -7.80 |
| <b>3L54</b> | -8.40 | -8.30 | -8.80 | -8.50 | -8.60 | -8.80 | -8.40 | -8.50 | -9.20 | -8.23 |
| <b>3L9J</b> | -7.70 | -8.10 | -8.00 | -7.30 | -7.10 | -7.60 | -7.20 | -8.20 | -7.80 | -7.40 |
| <b>3L9N</b> | -7.50 | -7.70 | -7.80 | -7.50 | -6.90 | -7.80 | -6.90 | -9.10 | -8.20 | -7.07 |
| <b>3LBD</b> | -6.90 | -7.20 | -7.50 | -7.30 | -7.70 | -6.90 | -6.80 | -7.80 | -6.60 | -7.30 |

|             |       |       |       |       |       |       |       |       |       |       |
|-------------|-------|-------|-------|-------|-------|-------|-------|-------|-------|-------|
| <b>3LBO</b> | -7.70 | -7.80 | -9.00 | -7.90 | -7.60 | -7.40 | -7.00 | -7.40 | -7.90 | -7.70 |
| <b>3LDQ</b> | -8.00 | -9.00 | -9.40 | -9.00 | -8.70 | -9.00 | -8.50 | -9.30 | -8.70 | -8.50 |
| <b>3LDX</b> | -8.70 | -7.50 | -8.20 | -8.40 | -8.00 | -7.50 | -7.10 | -7.20 | -8.20 | -7.67 |
| <b>3LE9</b> | -7.40 | -7.50 | -7.50 | -7.30 | -7.20 | -     | -8.20 | -8.50 | -7.40 | -7.73 |
| <b>3LEV</b> | -7.40 | -7.20 | -7.70 | -7.40 | -7.50 | -7.50 | -7.50 | -7.50 | -7.30 | -7.30 |
| <b>3LKJ</b> | -8.00 | -8.40 | -9.10 | -7.90 | -8.30 | -9.00 | -7.70 | -8.60 | -8.30 | -8.63 |
| <b>3LQ8</b> | -8.10 | -8.20 | -8.00 | -8.20 | -7.50 | -     | -7.40 | -7.90 | -8.10 | -7.90 |
| <b>3LQM</b> | -7.10 | -6.80 | -7.60 | -7.60 | -6.90 | -7.00 | -7.30 | -6.80 | -7.30 | -7.10 |
| <b>3LV3</b> | -7.90 | -8.10 | -8.30 | -8.40 | -8.30 | -9.00 | -8.80 | -7.90 | -8.60 | -8.37 |
| <b>3LZB</b> | -7.30 | -8.10 | -7.80 | -8.00 | -7.20 | -     | -7.20 | -7.50 | -7.40 | -7.73 |
| <b>3MAP</b> | -7.70 | -8.10 | -8.30 | -8.10 | -8.00 | -7.70 | -8.40 | -7.80 | -8.50 | -7.50 |
| <b>3MAX</b> | -8.10 | -7.30 | -8.70 | -8.20 | -8.10 | -8.40 | -8.30 | -8.00 | -8.50 | -8.00 |
| <b>3MBL</b> | -7.50 | -7.70 | -8.40 | -7.70 | -6.90 | -     | -7.20 | -8.50 | -8.00 | -8.73 |
| <b>3MDY</b> | -7.60 | -8.00 | -8.20 | -7.80 | -7.70 | -7.90 | -7.90 | -8.30 | -8.00 | -7.53 |
| <b>3MJ1</b> | -6.60 | -6.50 | -7.10 | -6.70 | -7.00 | -6.90 | -6.40 | -7.50 | -6.80 | -6.77 |
| <b>3MJG</b> | -7.00 | -6.80 | -7.30 | -6.90 | -6.80 | -6.90 | -6.70 | -6.90 | -7.10 | -6.70 |
| <b>3MK8</b> | -7.10 | -6.80 | -6.90 | -7.10 | -6.50 | -6.30 | -6.90 | -6.80 | -6.80 | -7.50 |
| <b>3MUP</b> | -8.10 | -8.20 | -8.40 | -7.80 | -7.70 | -8.20 | -7.60 | -8.30 | -7.90 | -7.30 |
| <b>3MVH</b> | -8.90 | -8.70 | -8.90 | -8.60 | -8.70 | -     | -8.70 | -9.30 | -8.70 | -8.40 |
| <b>3MWD</b> | -7.90 | -8.60 | -8.50 | -7.90 | -8.00 | -7.80 | -7.90 | -8.40 | -7.90 | -8.30 |
| <b>3N3F</b> | -6.40 | -6.50 | -6.30 | -6.50 | -5.60 | -6.00 | -5.70 | -6.40 | -6.10 | -5.90 |

|             |        |       |        |       |       |       |       |        |       |       |
|-------------|--------|-------|--------|-------|-------|-------|-------|--------|-------|-------|
| <b>3NBV</b> | -8.40  | -7.80 | -8.90  | -8.40 | -8.20 | -8.70 | -8.20 | -8.30  | -9.20 | -8.03 |
| <b>3NG8</b> | -6.70  | -6.40 | -6.20  | -6.30 | -6.60 | -6.20 | -6.20 | -6.10  | -6.60 | -6.10 |
| <b>3NL7</b> | -7.00  | -6.40 | -7.30  | -6.90 | -6.30 | -7.20 | -6.50 | -6.70  | -7.00 | -7.23 |
| <b>3NMM</b> | -8.50  | -8.40 | -8.10  | -8.20 | -8.20 | -8.10 | -8.00 | -8.20  | -8.80 | -8.00 |
| <b>3NMQ</b> | -8.70  | -9.20 | -9.10  | -9.00 | -7.90 | -8.20 | -7.20 | -7.90  | -9.60 | -7.57 |
| <b>3NPC</b> | -7.20  | -7.20 | -7.40  | -7.20 | -7.40 | -7.30 | -7.40 | -8.20  | -7.60 | -7.87 |
| <b>3NXP</b> | -7.80  | -7.40 | -7.70  | -7.70 | -7.20 | -7.90 | -7.50 | -7.50  | -7.60 | -7.50 |
| <b>3NXQ</b> | -9.10  | -9.00 | -9.00  | -8.90 | -8.80 | -8.80 | -8.70 | -9.00  | -8.90 | -8.67 |
| <b>3O0I</b> | -9.00  | -9.50 | -9.30  | -9.00 | -7.80 | -8.20 | -7.50 | -7.90  | -9.70 | -7.77 |
| <b>3O3U</b> | -10.10 | -8.50 | -10.20 | -9.50 | -8.60 | -9.30 | -9.00 | -10.00 | -9.10 | -8.77 |
| <b>3O5X</b> | -7.40  | -6.50 | -7.30  | -7.50 | -7.20 | -6.90 | -7.10 | -7.10  | -6.70 | -7.10 |
| <b>3O96</b> | -7.90  | -9.10 | -9.30  | -8.00 | -7.80 | -8.50 | -8.50 | -8.40  | -9.70 | -8.77 |
| <b>3OB7</b> | -8.40  | -8.00 | -8.90  | -8.50 | -8.50 | -8.20 | -8.20 | -8.10  | -8.20 | -8.40 |
| <b>3OCB</b> | -8.30  | -8.60 | -8.70  | -8.30 | -8.50 | -8.50 | -8.40 | -8.80  | -8.80 | -8.27 |
| <b>3OD5</b> | -6.90  | -7.40 | -7.80  | -7.00 | -6.60 | -7.60 | -6.90 | -7.20  | -7.40 | -7.10 |
| <b>3ODW</b> | -7.20  | -7.60 | -7.50  | -7.10 | -7.10 | -8.00 | -7.70 | -7.70  | -7.30 | -7.00 |
| <b>3OFS</b> | -7.90  | -8.60 | -8.60  | -8.50 | -8.20 | -8.40 | -8.10 | -8.70  | -8.40 | -8.27 |
| <b>3OJ3</b> | -8.40  | -8.20 | -8.90  | -8.60 | -8.70 | -8.90 | -8.30 | -8.90  | -8.80 | -8.60 |
| <b>3OLD</b> | -8.90  | -9.00 | -8.90  | -8.90 | -8.60 | -9.00 | -9.30 | -8.60  | -9.20 | -8.20 |
| <b>3OLL</b> | -8.20  | -8.10 | -8.20  | -8.30 | -7.70 | -8.30 | -7.80 | -8.00  | -7.70 | -8.00 |
| <b>3OLS</b> | -7.40  | -7.80 | -8.40  | -8.20 | -7.70 | -8.00 | -8.10 | -7.80  | -7.60 | -7.47 |

|             |       |       |       |       |       |       |       |       |       |       |
|-------------|-------|-------|-------|-------|-------|-------|-------|-------|-------|-------|
| <b>3OQ5</b> | -8.70 | -8.30 | -8.20 | -8.00 | -8.40 | -8.20 | -8.20 | -8.40 | -8.70 | -8.80 |
| <b>3OS3</b> | -7.60 | -9.10 | -8.10 | -7.40 | -7.20 | -7.70 | -6.80 | -8.20 | -7.60 | -7.33 |
| <b>3OW4</b> | -8.30 | -8.40 | -8.70 | -8.00 | -8.50 | -8.20 | -7.90 | -8.70 | -8.50 | -8.23 |
| <b>3OWD</b> | -7.80 | -7.40 | -7.60 | -7.70 | -6.80 | -     | -7.00 | -7.10 | -7.10 | -8.13 |
| <b>3OY8</b> | -7.30 | -7.40 | -7.10 | -6.80 | -6.50 | -6.60 | -7.00 | -7.30 | -7.00 | -6.87 |
| <b>3OZK</b> | -6.80 | -6.40 | -7.00 | -7.00 | -6.50 | -6.40 | -6.30 | -7.10 | -6.90 | -6.50 |
| <b>3P0U</b> | -7.40 | -7.60 | -8.60 | -7.40 | -6.90 | -7.30 | -6.80 | -7.70 | -7.10 | -8.03 |
| <b>3P1D</b> | -8.00 | -7.20 | -7.90 | -7.60 | -6.70 | -7.40 | -6.80 | -7.50 | -7.40 | -7.50 |
| <b>3PL6</b> | -7.30 | -7.50 | -8.20 | -7.60 | -7.30 | -7.40 | -7.80 | -7.50 | -7.70 | -7.63 |
| <b>3PLZ</b> | -9.30 | -8.80 | -9.40 | -9.30 | -9.40 | -9.50 | -8.60 | -8.30 | -8.70 | -8.70 |
| <b>3PM0</b> | -8.20 | -7.90 | -8.20 | -8.60 | -8.20 | -7.90 | -7.40 | -8.00 | -7.80 | -7.80 |
| <b>3PP0</b> | -7.30 | -8.10 | -8.00 | -7.70 | -7.60 | -7.30 | -7.40 | -8.90 | -8.30 | -7.60 |
| <b>3PP1</b> | -7.80 | -7.20 | -8.60 | -8.40 | -8.60 | -     | -8.20 | -8.00 | -8.60 | -8.40 |
| <b>3PSL</b> | -8.60 | -8.20 | -8.70 | -8.20 | -8.00 | -8.20 | -8.60 | -8.80 | -8.80 | -8.80 |
| <b>3PTA</b> | -7.10 | -7.30 | -7.90 | -7.50 | -7.90 | -8.30 | -7.90 | -7.70 | -7.90 | -8.03 |
| <b>3PTA</b> | -7.10 | -7.30 | -7.90 | -7.50 | -7.90 | -8.30 | -7.90 | -7.70 | -7.90 | -8.03 |
| <b>3PUF</b> | -7.60 | -7.70 | -8.70 | -8.00 | -7.90 | -8.30 | -8.00 | -8.20 | -8.00 | -7.97 |
| <b>3Q93</b> | -7.30 | -8.40 | -8.30 | -7.40 | -7.20 | -7.70 | -9.00 | -7.30 | -7.60 | -8.23 |
| <b>3QAK</b> | -7.30 | -7.00 | -7.70 | -7.40 | -7.20 | -7.20 | -6.70 | -7.70 | -7.50 | -6.80 |
| <b>3QBJ</b> | -8.00 | -7.60 | -7.80 | -8.10 | -7.50 | -8.10 | -8.00 | -7.90 | -7.60 | -8.10 |
| <b>3QD6</b> | -8.20 | -7.40 | -8.30 | -8.20 | -7.20 | -7.60 | -7.50 | -7.50 | -7.40 | -7.60 |



|             |       |       |       |       |       |       |       |       |       |       |
|-------------|-------|-------|-------|-------|-------|-------|-------|-------|-------|-------|
| <b>3QKL</b> | -8.60 | -8.90 | -9.00 | -8.90 | -9.80 | -9.30 | -8.70 | -9.00 | -8.90 | -9.00 |
| <b>3QM4</b> | -8.60 | -7.80 | -8.60 | -9.00 | -8.50 | -8.60 | -8.10 | -8.50 | -8.30 | -8.23 |
| <b>3QOA</b> | -7.80 | -6.80 | -7.80 | -7.40 | -6.90 | -7.50 | -6.70 | -7.00 | -7.50 | -7.50 |
| <b>3QU8</b> | -7.80 | -7.20 | -8.60 | -8.60 | -7.70 | -7.80 | -7.50 | -7.40 | -7.60 | -8.17 |
| <b>3QWC</b> | -7.80 | -7.50 | -8.60 | -7.80 | -7.60 | -7.50 | -6.80 | -7.30 | -7.70 | -7.17 |
| <b>3QX3</b> | -7.90 | -7.80 | -9.00 | -8.60 | -8.80 | -9.10 | -8.70 | -8.90 | -7.60 | -9.07 |
| <b>3RQD</b> | -7.10 | -7.00 | -7.70 | -7.40 | -7.20 | -7.50 | -7.20 | -6.70 | -6.90 | -7.17 |
| <b>3RUK</b> | -8.80 | -8.00 | -8.30 | -8.70 | -8.10 | -9.10 | -7.70 | -7.80 | -7.90 | -8.30 |
| <b>3S95</b> | -8.20 | -8.80 | -9.00 | -8.40 | -8.20 | -8.90 | -7.80 | -8.70 | -9.20 | -8.07 |
| <b>3SOR</b> | -7.80 | -7.10 | -7.50 | -7.90 | -7.20 | -7.50 | -7.50 | -7.40 | -7.50 | -7.10 |
| <b>3SOS</b> | -7.60 | -7.70 | -8.00 | -7.80 | -7.40 | -7.40 | -7.40 | -7.30 | -7.60 | -7.10 |
| <b>3SW2</b> | -8.50 | -8.00 | -8.00 | -8.50 | -7.70 | -7.50 | -6.90 | -7.40 | -7.50 | -8.10 |
| <b>3SWR</b> | -7.40 | -7.50 | -8.20 | -8.10 | -7.90 | -8.10 | -7.90 | -7.90 | -8.00 | -8.90 |
| <b>3T03</b> | -8.30 | -8.00 | -8.50 | -8.30 | -8.30 | -9.20 | -8.30 | -8.30 | -8.40 | -8.27 |
| <b>3TH5</b> | -7.80 | -7.80 | -7.90 | -7.30 | -7.50 | -7.60 | -7.40 | -7.60 | -7.40 | -7.80 |
| <b>3TKM</b> | -8.00 | -7.50 | -8.10 | -8.60 | -7.90 | -     | -7.90 | -7.40 | -8.10 | -7.80 |
| <b>3TOP</b> | -7.40 | -6.60 | -7.30 | -7.00 | -7.30 | -7.40 | -8.20 | -7.40 | -6.80 | -7.10 |
| <b>3TXO</b> | -7.80 | -9.20 | -9.50 | -7.80 | -7.70 | -8.50 | -8.30 | -9.00 | -8.50 | -7.93 |
| <b>3TY0</b> | -8.10 | -7.80 | -7.80 | -8.20 | -7.60 | -7.80 | -7.50 | -8.60 | -8.40 | -7.60 |
| <b>3U4S</b> | -7.80 | -7.60 | -7.70 | -7.60 | -7.70 | -7.80 | -7.80 | -8.00 | -7.70 | -7.43 |
| <b>3U6I</b> | -7.30 | -7.40 | -6.70 | -7.10 | -6.50 | -     | -6.50 | -6.90 | -7.70 | -7.07 |

|             |       |       |       |       |       |       |       |       |       |       |
|-------------|-------|-------|-------|-------|-------|-------|-------|-------|-------|-------|
| <b>3U9Q</b> | -7.40 | -7.20 | -7.40 | -7.10 | -7.00 | -6.60 | -6.60 | -8.10 | -7.90 | -7.00 |
| <b>3UA1</b> | -9.20 | -9.60 | -9.00 | -9.00 | -8.40 | -9.50 | -8.20 | -8.70 | -9.80 | -8.60 |
| <b>3UA5</b> | -8.70 | -9.10 | -8.80 | -9.00 | -7.70 | -9.00 | -7.90 | -9.10 | -8.20 | -8.37 |
| <b>3UEE</b> | -7.10 | -6.50 | -7.10 | -6.60 | -6.40 | -6.70 | -6.50 | -6.80 | -7.10 | -6.50 |
| <b>3UIH</b> | -6.60 | -6.80 | -6.90 | -6.80 | -6.50 | -6.90 | -6.70 | -6.80 | -7.00 | -6.80 |
| <b>3UIU</b> | -7.60 | -7.50 | -8.30 | -8.00 | -7.40 | -7.50 | -7.70 | -7.80 | -7.90 | -7.30 |
| <b>3UL7</b> | -6.40 | -6.90 | -6.30 | -6.50 | -6.60 | -     | -6.40 | -6.70 | -6.80 | -7.00 |
| <b>3UL8</b> | -6.70 | -7.20 | -7.00 | -7.00 | -7.20 | -     | -6.90 | -6.90 | -7.00 | -7.67 |
| <b>3UL9</b> | -6.90 | -6.80 | -6.70 | -7.10 | -6.30 | -     | -7.00 | -7.30 | -6.70 | -6.30 |
| <b>3ULA</b> | -7.70 | -8.30 | -8.70 | -8.30 | -7.80 | -     | -8.50 | -7.70 | -8.50 | -8.40 |
| <b>3UNJ</b> | -7.80 | -7.00 | -7.50 | -8.10 | -7.00 | -6.90 | -7.20 | -7.90 | -7.30 | -7.17 |
| <b>3UO5</b> | -8.50 | -8.70 | -8.00 | -8.70 | -7.50 | -8.00 | -7.50 | -8.40 | -8.80 | -7.30 |
| <b>3UOK</b> | -8.90 | -8.10 | -8.60 | -8.50 | -8.40 | -8.20 | -7.80 | -7.90 | -8.20 | -8.37 |
| <b>3UQP</b> | -6.70 | -6.50 | -6.80 | -6.90 | -7.30 | -6.90 | -6.70 | -6.90 | -6.80 | -6.73 |
| <b>3UT3</b> | -8.70 | -9.00 | -9.40 | -8.70 | -9.00 | -9.10 | -9.20 | -8.90 | -9.20 | -8.70 |
| <b>3UVV</b> | -7.80 | -8.00 | -8.20 | -7.80 | -7.90 | -8.20 | -7.70 | -8.00 | -8.00 | -7.70 |
| <b>3UYT</b> | -7.40 | -7.50 | -8.20 | -7.90 | -7.60 | -8.20 | -7.50 | -8.30 | -7.80 | -7.80 |
| <b>3V6R</b> | -7.40 | -7.70 | -8.30 | -7.30 | -7.60 | -7.80 | -7.80 | -8.90 | -8.50 | -7.60 |
| <b>3VEV</b> | -8.50 | -8.00 | -8.00 | -8.30 | -7.90 | -8.60 | -7.90 | -8.40 | -8.10 | -7.67 |
| <b>3VEY</b> | -8.60 | -8.40 | -7.90 | -8.40 | -8.00 | -8.30 | -8.30 | -8.00 | -8.10 | -7.60 |
| <b>3VHE</b> | -7.90 | -8.10 | -9.00 | -7.60 | -8.30 | -8.70 | -8.50 | -7.70 | -8.40 | -8.20 |

|             |        |       |       |       |       |        |       |       |       |       |
|-------------|--------|-------|-------|-------|-------|--------|-------|-------|-------|-------|
| <b>3VI8</b> | -8.10  | -8.40 | -7.90 | -8.10 | -6.60 | -10.10 | -6.50 | -7.70 | -7.30 | -6.37 |
| <b>3VJH</b> | -8.00  | -7.70 | -7.90 | -7.80 | -7.20 | -7.50  | -7.50 | -7.60 | -8.10 | -7.20 |
| <b>3VJI</b> | -7.60  | -8.00 | -7.90 | -7.60 | -7.40 | -8.40  | -7.60 | -7.60 | -8.00 | -7.37 |
| <b>3VKX</b> | -7.20  | -6.40 | -6.90 | -6.80 | -6.40 | -6.70  | -6.30 | -6.90 | -6.80 | -6.23 |
| <b>3VVH</b> | -7.90  | -7.90 | -8.30 | -8.30 | -8.30 | -      | -7.80 | -8.70 | -8.50 | -7.80 |
| <b>3VW6</b> | -7.10  | -7.20 | -7.30 | -7.00 | -7.20 | -7.00  | -6.40 | -7.40 | -8.00 | -6.70 |
| <b>3VW7</b> | -10.10 | -7.80 | -8.70 | -8.10 | -9.20 | -      | -7.70 | -8.30 | -9.00 | -8.73 |
| <b>3W33</b> | -7.70  | -8.30 | -8.30 | -8.20 | -7.30 | -7.10  | -7.20 | -9.00 | -8.50 | -7.30 |
| <b>3W3G</b> | -7.80  | -7.90 | -8.00 | -8.40 | -8.00 | -      | -8.70 | -8.70 | -8.00 | -8.10 |
| <b>3W3J</b> | -8.60  | -8.70 | -8.40 | -8.60 | -8.60 | -      | -8.50 | -9.90 | -9.10 | -8.57 |
| <b>3W3K</b> | -8.80  | -8.50 | -9.30 | -8.40 | -8.20 | -      | -8.50 | -8.70 | -8.40 | -8.23 |
| <b>3W3L</b> | -8.00  | -7.70 | -8.20 | -8.30 | -7.20 | -      | -7.50 | -7.90 | -8.00 | -8.27 |
| <b>3W3M</b> | -8.30  | -8.30 | -8.90 | -8.50 | -7.70 | -      | -7.90 | -8.30 | -8.30 | -8.53 |
| <b>3W3N</b> | -9.20  | -8.50 | -8.80 | -9.00 | -8.40 | -      | -8.40 | -9.00 | -8.70 | -8.70 |
| <b>3WHW</b> | -7.30  | -8.60 | -8.80 | -7.60 | -7.80 | -8.60  | -7.20 | -7.90 | -8.50 | -9.13 |
| <b>3WN4</b> | -8.20  | -8.10 | -8.70 | -8.40 | -8.10 | -      | -7.30 | -7.90 | -8.70 | -8.63 |
| <b>3WQH</b> | -7.90  | -7.70 | -8.00 | -7.80 | -7.50 | -8.10  | -8.00 | -7.50 | -7.70 | -7.50 |
| <b>3X36</b> | -7.90  | -9.10 | -8.90 | -8.50 | -7.70 | -8.30  | -9.90 | -7.00 | -8.80 | -8.80 |
| <b>3ZBF</b> | -7.20  | -7.60 | -7.40 | -7.30 | -6.60 | -7.00  | -6.90 | -7.90 | -7.60 | -7.00 |
| <b>3ZEP</b> | -7.30  | -7.20 | -8.60 | -7.20 | -7.90 | -8.50  | -7.60 | -7.80 | -7.90 | -7.83 |
| <b>3ZGV</b> | -8.50  | -7.80 | -8.90 | -8.70 | -7.70 | -8.10  | -8.00 | -8.00 | -8.00 | -8.13 |

|             |       |       |        |       |       |       |       |        |       |       |
|-------------|-------|-------|--------|-------|-------|-------|-------|--------|-------|-------|
| <b>3ZLN</b> | -7.00 | -7.10 | -7.60  | -7.30 | -6.50 | -7.00 | -6.30 | -6.90  | -7.40 | -6.73 |
| <b>3ZME</b> | -7.50 | -7.90 | -7.80  | -7.50 | -7.90 | -     | -7.60 | -8.00  | -7.70 | -8.00 |
| <b>3ZNS</b> | -8.20 | -8.90 | -8.50  | -8.40 | -8.30 | -8.10 | -8.20 | -8.70  | -8.80 | -7.73 |
| <b>3ZR0</b> | -7.30 | -8.90 | -8.00  | -7.90 | -7.30 | -7.40 | -7.40 | -7.50  | -8.10 | -8.00 |
| <b>3ZR1</b> | -7.60 | -8.70 | -8.00  | -7.50 | -7.30 | -7.50 | -7.40 | -7.50  | -8.10 | -7.83 |
| <b>3ZXZ</b> | -8.90 | -7.60 | -8.00  | -8.60 | -7.40 | -     | -6.80 | -7.50  | -7.20 | -7.63 |
| <b>3ZZE</b> | -8.70 | -7.70 | -7.90  | -8.30 | -6.80 | -     | -7.50 | -8.20  | -7.50 | -7.83 |
| <b>4A5S</b> | -8.10 | -7.70 | -8.00  | -8.20 | -7.70 | -7.90 | -7.60 | -7.70  | -8.10 | -8.07 |
| <b>4A7A</b> | -7.70 | -7.90 | -8.00  | -7.80 | -7.80 | -8.00 | -7.80 | -7.60  | -8.00 | -7.80 |
| <b>4A7I</b> | -7.40 | -8.30 | -7.40  | -7.30 | -6.80 | -7.10 | -7.30 | -8.00  | -7.20 | -6.93 |
| <b>4ACG</b> | -8.00 | -8.70 | -8.20  | -8.50 | -8.10 | -8.60 | -8.00 | -9.00  | -8.00 | -8.17 |
| <b>4AG8</b> | -8.30 | -8.40 | -9.10  | -7.90 | -8.00 | -8.10 | -8.20 | -8.30  | -8.70 | -8.03 |
| <b>4AJU</b> | -8.20 | -8.30 | -8.60  | -8.10 | -7.40 | -7.50 | -7.40 | -7.60  | -8.10 | -7.30 |
| <b>4AL0</b> | -6.30 | -6.40 | -6.40  | -6.20 | -6.00 | -     | -6.20 | -6.10  | -6.50 | -6.20 |
| <b>4AOJ</b> | -8.10 | -8.90 | -11.00 | -8.10 | -7.70 | -8.00 | -8.10 | -10.00 | -9.30 | -7.97 |
| <b>4ASD</b> | -8.10 | -7.80 | -8.40  | -7.80 | -8.40 | -8.10 | -7.90 | -7.90  | -8.00 | -7.87 |
| <b>4ASK</b> | -7.60 | -7.30 | -7.80  | -7.90 | -7.80 | -7.50 | -7.40 | -8.20  | -8.50 | -7.50 |
| <b>4ASX</b> | -8.20 | -7.60 | -8.40  | -7.80 | -7.80 | -8.30 | -8.60 | -8.10  | -7.60 | -7.83 |
| <b>4B0O</b> | -9.80 | -9.60 | -9.60  | -9.80 | -9.10 | -9.00 | -8.80 | -9.10  | -9.60 | -9.40 |
| <b>4B0Q</b> | -8.60 | -8.60 | -8.50  | -8.90 | -8.40 | -9.20 | -8.50 | -8.90  | -8.70 | -9.03 |
| <b>4B3E</b> | -8.30 | -8.10 | -8.80  | -8.40 | -8.40 | -8.90 | -8.70 | -8.60  | -8.50 | -8.67 |

|             |       |       |       |       |       |       |       |       |       |       |
|-------------|-------|-------|-------|-------|-------|-------|-------|-------|-------|-------|
| <b>4B70</b> | -7.80 | -8.20 | -8.50 | -8.00 | -7.30 | -7.70 | -8.20 | -8.00 | -8.50 | -8.23 |
| <b>4BAQ</b> | -7.40 | -7.50 | -8.10 | -7.70 | -7.30 | -7.70 | -7.60 | -7.30 | -7.50 | -7.33 |
| <b>4BB4</b> | -7.60 | -8.50 | -8.60 | -7.70 | -7.30 | -7.80 | -7.90 | -8.40 | -8.30 | -7.30 |
| <b>4BDS</b> | -9.50 | -9.20 | -9.70 | -9.60 | -9.00 | -8.80 | -8.70 | -9.00 | -9.10 | -9.20 |
| <b>4BEX</b> | -6.90 | -7.00 | -6.60 | -7.20 | -6.20 | -6.90 | -6.50 | -6.90 | -7.10 | -6.80 |
| <b>4BF2</b> | -7.30 | -8.40 | -7.90 | -7.40 | -7.40 | -8.00 | -7.20 | -8.60 | -7.90 | -7.10 |
| <b>4BPM</b> | -6.50 | -6.40 | -6.40 | -6.30 | -5.90 | -     | -6.10 | -6.40 | -6.40 | -6.33 |
| <b>4BTI</b> | -8.70 | -8.40 | -8.40 | -8.70 | -8.10 | -8.20 | -8.20 | -8.30 | -8.10 | -8.70 |
| <b>4BVA</b> | -8.00 | -7.90 | -8.20 | -7.90 | -8.40 | -8.80 | -8.60 | -8.10 | -8.20 | -8.40 |
| <b>4C8B</b> | -8.00 | -8.50 | -8.80 | -7.80 | -8.60 | -9.10 | -9.00 | -9.00 | -8.90 | -8.43 |
| <b>4C9W</b> | -8.70 | -8.90 | -8.50 | -8.70 | -8.20 | -8.10 | -8.50 | -8.90 | -8.70 | -8.20 |
| <b>4C9X</b> | -9.30 | -9.50 | -9.80 | -9.10 | -8.80 | -9.10 | -9.20 | -9.00 | -8.90 | -9.27 |
| <b>4CFF</b> | -7.70 | -7.60 | -8.80 | -9.00 | -8.50 | -9.00 | -8.40 | -7.90 | -8.90 | -8.20 |
| <b>4CR5</b> | -8.10 | -7.60 | -7.70 | -8.20 | -7.70 | -7.50 | -7.20 | -7.70 | -7.40 | -7.47 |
| <b>4D18</b> | -7.70 | -7.60 | -7.90 | -7.70 | -7.50 | -     | -7.60 | -7.40 | -7.30 | 0.00  |
| <b>4D6Z</b> | -8.70 | -9.20 | -8.70 | -8.50 | -8.20 | -9.30 | -8.10 | -8.80 | -9.40 | -8.67 |
| <b>4D75</b> | -8.90 | -9.20 | -8.60 | -8.80 | -8.20 | -9.90 | -8.20 | -8.80 | -9.70 | -8.70 |
| <b>4D76</b> | -8.30 | -7.40 | -7.30 | -8.40 | -7.40 | -7.60 | -7.50 | -7.70 | -7.50 | -7.20 |
| <b>4D89</b> | -8.60 | -8.70 | -8.80 | -9.00 | -8.50 | -8.20 | -7.90 | -8.70 | -8.70 | -8.60 |
| <b>4DCH</b> | -8.00 | -8.40 | -8.60 | -8.20 | -8.30 | -8.20 | -7.90 | -8.60 | -8.60 | -8.07 |
| <b>4DJH</b> | -7.70 | -7.40 | -9.40 | -7.60 | -7.30 | -7.90 | -7.30 | -7.60 | -7.60 | -7.40 |

|             |       |       |        |       |       |       |       |       |       |       |
|-------------|-------|-------|--------|-------|-------|-------|-------|-------|-------|-------|
| <b>4DM6</b> | -7.80 | -7.60 | -8.10  | -7.70 | -7.70 | -8.10 | -8.30 | -7.50 | -7.90 | -7.33 |
| <b>4DM8</b> | -7.90 | -8.40 | -8.30  | -7.90 | -8.10 | -8.30 | -7.90 | -8.50 | -8.10 | -7.70 |
| <b>4DMA</b> | -7.30 | -7.60 | -8.80  | -7.80 | -7.50 | -7.30 | -7.30 | -7.30 | -7.50 | -7.80 |
| <b>4DOS</b> | -8.90 | -8.70 | -9.10  | -9.40 | -8.40 | -8.50 | -8.20 | -8.10 | -7.90 | -8.50 |
| <b>4DQM</b> | -8.10 | -6.90 | -8.60  | -8.30 | -7.60 | -7.80 | -7.90 | -7.80 | -7.20 | -8.40 |
| <b>4DRJ</b> | -9.40 | -9.30 | -10.50 | -9.30 | -9.40 | -9.70 | -8.90 | -9.40 | -9.10 | -8.87 |
| <b>4DVF</b> | -7.40 | -6.90 | -7.90  | -7.20 | -7.20 | -7.50 | -6.80 | -7.20 | -7.20 | -7.10 |
| <b>4DY0</b> | -7.10 | -7.10 | -7.60  | -7.30 | -7.10 | -7.60 | -7.40 | -7.40 | -7.20 | -6.97 |
| <b>4DYM</b> | -7.60 | -8.80 | -9.20  | -7.80 | -7.80 | -7.90 | -7.50 | -9.80 | -9.00 | -7.43 |
| <b>4E2J</b> | -7.80 | -8.00 | -8.60  | -7.70 | -7.80 | -8.80 | -8.40 | -8.10 | -8.60 | -9.00 |
| <b>4EBV</b> | -7.50 | -6.90 | -7.30  | -7.60 | -6.90 | -7.70 | -7.60 | -7.60 | -7.80 | -7.70 |
| <b>4EK4</b> | -6.90 | -6.90 | -7.30  | -7.30 | -6.90 | -     | -7.10 | -7.10 | -7.00 | -6.80 |
| <b>4EKG</b> | -7.50 | -7.50 | -7.70  | -7.30 | -7.70 | -7.60 | -7.70 | -7.60 | -8.10 | -7.70 |
| <b>4EM9</b> | -8.00 | -8.00 | -8.30  | -8.10 | -7.80 | -7.50 | -7.50 | -7.90 | -8.50 | -8.37 |
| <b>4EMA</b> | -8.00 | -7.90 | -8.30  | -8.20 | -7.60 | -8.60 | -7.70 | -7.70 | -8.40 | -7.73 |
| <b>4EY4</b> | -8.30 | -8.10 | -8.00  | -8.50 | -8.20 | -8.50 | -7.50 | -8.20 | -8.40 | -8.43 |
| <b>4EY5</b> | -8.30 | -8.60 | -8.00  | -8.40 | -7.80 | -8.50 | -7.60 | -8.20 | -8.70 | -8.43 |
| <b>4EY6</b> | -8.10 | -8.30 | -7.90  | -8.20 | -7.80 | -8.30 | -7.40 | -8.10 | -8.40 | -7.97 |
| <b>4EY7</b> | -8.40 | -8.10 | -8.00  | -8.50 | -8.10 | -8.30 | -8.20 | -8.40 | -8.30 | -8.33 |
| <b>4FA2</b> | -8.40 | -8.40 | -8.70  | -8.40 | -7.90 | -7.90 | -7.60 | -9.70 | -8.80 | -7.70 |
| <b>4FM9</b> | -8.70 | -9.10 | -9.10  | -9.00 | -9.20 | -9.30 | -9.40 | -8.80 | -9.50 | -8.97 |

|             |       |       |       |       |       |       |       |       |       |       |
|-------------|-------|-------|-------|-------|-------|-------|-------|-------|-------|-------|
| <b>4FVT</b> | -8.90 | -9.80 | -8.40 | -9.00 | -8.20 | -8.70 | -8.30 | -7.60 | -9.10 | -8.30 |
| <b>4FWF</b> | -8.00 | -7.60 | -8.30 | -8.00 | -7.60 | -7.60 | -7.50 | -7.80 | -7.80 | -7.90 |
| <b>4FYR</b> | -8.90 | -9.40 | -9.40 | -9.50 | -8.50 | -8.60 | -8.40 | -9.60 | -9.50 | -8.17 |
| <b>4G5J</b> | -7.30 | -7.40 | -7.90 | -7.30 | -7.30 | -7.20 | -7.40 | -7.50 | -7.50 | -7.27 |
| <b>4GQS</b> | -7.70 | -7.30 | -8.60 | -7.80 | -7.50 | -8.20 | -7.80 | -7.30 | -7.40 | -7.97 |
| <b>4GU0</b> | -8.20 | -8.10 | -8.60 | -8.70 | -8.50 | -8.20 | -8.20 | -8.60 | -8.40 | -8.70 |
| <b>4HLW</b> | -7.20 | -7.90 | -7.90 | -7.20 | -7.20 | -7.70 | -6.80 | -7.50 | -8.40 | -7.53 |
| <b>4I0F</b> | -7.60 | -7.60 | -7.60 | -7.90 | -7.90 | -7.70 | -8.10 | -7.40 | -8.00 | -8.20 |
| <b>4I5I</b> | -7.70 | -7.50 | -7.90 | -8.20 | -7.50 | -7.60 | -7.90 | -7.90 | -7.90 | -8.13 |
| <b>4IDT</b> | -7.80 | -8.60 | -9.00 | -7.40 | -8.00 | -9.20 | -8.90 | -9.20 | -9.40 | -8.40 |
| <b>4IEH</b> | -7.10 | -6.80 | -7.70 | -7.10 | -7.30 | -7.10 | -7.10 | -7.20 | -7.40 | -7.40 |
| <b>4IP9</b> | -7.00 | -7.30 | -7.50 | -7.10 | -7.20 | -7.00 | -7.20 | -7.30 | -7.40 | -7.40 |
| <b>4IS8</b> | -7.90 | -7.60 | -8.50 | -9.70 | -8.70 | -8.90 | -8.40 | -8.40 | -7.50 | -8.13 |
| <b>4ISE</b> | -8.00 | -8.10 | -8.60 | -7.90 | -7.90 | -8.10 | -7.80 | -8.70 | -8.40 | -7.90 |
| <b>4ISF</b> | -8.00 | -8.00 | -8.10 | -7.60 | -8.00 | -7.60 | -7.70 | -8.10 | -8.40 | -8.00 |
| <b>4ISG</b> | -7.40 | -7.50 | -7.70 | -7.50 | -7.40 | -7.50 | -7.80 | -8.00 | -7.80 | -7.70 |
| <b>4IWV</b> | -8.30 | -7.90 | -8.10 | -8.10 | -7.90 | -8.20 | -8.30 | -7.80 | -8.30 | -7.83 |
| <b>4IXC</b> | -7.70 | -7.70 | -7.80 | -7.60 | -8.40 | -8.10 | -7.70 | -7.70 | -8.20 | -7.57 |
| <b>4IZY</b> | -8.30 | -7.50 | -8.00 | -7.80 | -7.70 | -7.30 | -7.10 | -7.70 | -7.80 | -7.13 |
| <b>4J1Y</b> | -7.20 | -7.40 | -7.20 | -7.40 | -7.40 | -7.40 | -7.20 | -7.70 | -7.00 | -6.90 |
| <b>4J52</b> | -8.60 | -8.40 | -8.90 | -9.00 | -7.70 | -7.70 | -7.70 | -8.90 | -8.30 | -7.80 |

|             |       |       |       |       |       |       |       |       |       |       |
|-------------|-------|-------|-------|-------|-------|-------|-------|-------|-------|-------|
| <b>4J8M</b> | -8.00 | -7.90 | -8.10 | -7.90 | -7.90 | -     | -7.40 | -8.30 | -7.90 | -8.20 |
| <b>4JNK</b> | -8.40 | -8.20 | -9.00 | -8.10 | -7.80 | -     | -7.70 | -8.30 | -8.80 | -7.80 |
| <b>4JPS</b> | -8.00 | -8.80 | -8.90 | -8.70 | -8.80 | -8.70 | -8.50 | -8.80 | -8.40 | -8.30 |
| <b>4JZF</b> | -7.30 | -6.90 | -7.20 | -7.30 | -6.90 | -7.80 | -6.80 | -7.30 | -7.00 | -6.90 |
| <b>4K9W</b> | -9.00 | -8.40 | -8.90 | -9.20 | -8.50 | -9.00 | -8.50 | -8.60 | -8.70 | -8.50 |
| <b>4KGH</b> | -6.50 | -6.40 | -6.50 | -6.70 | -6.40 | -6.40 | -6.70 | -6.30 | -6.80 | -6.53 |
| <b>4KMN</b> | -6.20 | -6.30 | -6.70 | -6.40 | -6.00 | -5.80 | -5.60 | -6.30 | -6.40 | -6.30 |
| <b>4KMP</b> | -7.50 | -6.90 | -7.80 | -7.00 | -6.90 | -6.90 | -6.70 | -8.20 | -7.40 | -7.30 |
| <b>4KXQ</b> | -7.60 | -7.60 | -7.60 | -7.00 | -7.40 | -7.40 | -7.00 | -7.20 | -7.90 | -7.60 |
| <b>4L02</b> | -8.40 | -8.50 | -8.20 | -9.00 | -7.70 | -8.20 | -8.20 | -8.30 | -7.70 | -8.30 |
| <b>4L3Q</b> | -8.20 | -8.00 | -8.20 | -8.70 | -8.00 | -8.40 | -7.60 | -7.80 | -8.10 | -7.70 |
| <b>4LGE</b> | -6.70 | -6.80 | -6.60 | -6.40 | -6.50 | -6.60 | -6.20 | -7.00 | -6.70 | -6.43 |
| <b>4LNW</b> | -7.90 | -7.80 | -7.60 | -7.90 | -7.70 | -8.10 | -7.60 | -8.10 | -8.30 | -8.07 |
| <b>4LNX</b> | -7.50 | -8.00 | -7.40 | -8.00 | -7.00 | -7.50 | -7.00 | -7.30 | -7.70 | -7.20 |
| <b>4LOG</b> | -7.30 | -7.40 | -8.00 | -8.00 | -7.70 | -8.10 | -7.20 | -7.10 | -7.50 | -8.00 |
| <b>4LVT</b> | -7.90 | -7.60 | -7.90 | -7.70 | -7.40 | -7.60 | -7.30 | -8.00 | -7.70 | -7.80 |
| <b>4LXZ</b> | -7.90 | -7.90 | -8.30 | -8.00 | -7.80 | -8.60 | -8.70 | -8.10 | -8.00 | -7.80 |
| <b>4LY1</b> | -7.80 | -7.40 | -8.20 | -7.80 | -8.00 | -8.20 | -7.60 | -7.70 | -8.10 | -7.70 |
| <b>4M8E</b> | -7.40 | -6.90 | -7.10 | -7.50 | -6.80 | -6.90 | -6.30 | -7.10 | -7.20 | -6.90 |
| <b>4M8H</b> | -7.70 | -6.90 | -7.70 | -7.60 | -6.80 | -6.90 | -6.40 | -7.20 | -7.10 | -6.50 |
| <b>4MAN</b> | -7.80 | -7.60 | -8.00 | -7.70 | -7.60 | -7.70 | -7.70 | -7.50 | -7.50 | -8.10 |



|             |       |       |        |       |       |       |       |       |       |       |
|-------------|-------|-------|--------|-------|-------|-------|-------|-------|-------|-------|
| <b>4MDN</b> | -7.80 | -7.30 | -7.30  | -7.50 | -6.90 | -7.10 | -7.10 | -7.00 | -7.20 | -7.00 |
| <b>4MG5</b> | -7.50 | -7.10 | -8.60  | -8.40 | -7.70 | -7.50 | -7.40 | -7.50 | -7.40 | -7.50 |
| <b>4MG6</b> | -9.20 | -8.60 | -8.60  | -8.40 | -7.60 | -8.00 | -7.80 | -7.80 | -7.80 | -7.70 |
| <b>4MG7</b> | -8.70 | -7.50 | -9.00  | -9.10 | -8.00 | -7.80 | -7.10 | -7.60 | -8.00 | -8.37 |
| <b>4MG8</b> | -7.50 | -8.00 | -8.60  | -7.30 | -7.40 | -7.50 | -7.70 | -7.40 | -7.80 | -7.40 |
| <b>4MG9</b> | -7.60 | -7.60 | -8.20  | -7.60 | -7.30 | -7.50 | -7.50 | -7.20 | -7.90 | -7.80 |
| <b>4MGA</b> | -7.60 | -7.60 | -8.50  | -7.70 | -7.40 | -7.60 | -7.60 | -7.50 | -7.90 | -7.50 |
| <b>4MGB</b> | -8.30 | -7.90 | -8.20  | -8.30 | -7.70 | -8.20 | -7.70 | -7.90 | -7.80 | -7.80 |
| <b>4MGC</b> | -7.40 | -7.50 | -8.60  | -7.80 | -7.20 | -7.90 | -7.40 | -7.20 | -8.00 | -7.37 |
| <b>4MGD</b> | -7.90 | -7.90 | -8.10  | -8.20 | -7.20 | -7.80 | -7.60 | -7.50 | -8.00 | -7.87 |
| <b>4MJH</b> | -9.80 | -9.90 | -10.90 | -9.50 | -9.50 | -9.90 | -9.60 | -9.00 | -9.00 | -8.90 |
| <b>4MLE</b> | -8.10 | -8.20 | -8.20  | -8.00 | -8.00 | -8.20 | -8.20 | -8.40 | -8.20 | -7.77 |
| <b>4MLH</b> | -7.90 | -8.60 | -8.00  | -8.00 | -8.10 | -8.50 | -8.00 | -8.00 | -8.50 | -8.10 |
| <b>4MXO</b> | -7.90 | -7.90 | -8.60  | -8.10 | -8.00 | -7.80 | -7.30 | -8.30 | -7.70 | -7.60 |
| <b>4N1T</b> | -6.20 | -6.80 | -6.70  | -6.20 | -6.70 | -7.30 | -6.90 | -6.80 | -7.00 | -6.10 |
| <b>4N1U</b> | -7.90 | -7.70 | -8.60  | -7.90 | -7.60 | -8.30 | -7.90 | -7.00 | -7.80 | -8.40 |
| <b>4NA7</b> | -8.10 | -7.60 | -8.00  | -8.30 | -7.60 | -7.40 | -7.50 | -8.20 | -7.50 | -7.00 |
| <b>4NA8</b> | -7.80 | -7.10 | -8.00  | -8.20 | -7.60 | -7.30 | -7.10 | -7.40 | -7.20 | -6.87 |
| <b>4NJD</b> | -7.50 | -7.60 | -7.50  | -7.40 | -7.00 | -7.00 | -6.90 | -7.90 | -7.60 | -7.93 |
| <b>4NO7</b> | -7.20 | -7.10 | -7.20  | -7.40 | -7.50 | -7.30 | -7.60 | -7.20 | -7.70 | -7.30 |
| <b>4NOS</b> | -8.50 | -8.70 | -10.40 | -8.30 | -7.80 | -8.30 | -8.00 | -8.40 | -9.80 | -8.57 |

|             |       |       |       |       |       |       |       |       |       |       |
|-------------|-------|-------|-------|-------|-------|-------|-------|-------|-------|-------|
| <b>4NRE</b> | -8.20 | -7.80 | -9.00 | -8.10 | -8.20 | -     | -8.30 | -7.80 | -8.50 | -8.27 |
| <b>4OAR</b> | -8.20 | -8.20 | -8.30 | -8.30 | -8.00 | -8.10 | -8.10 | -8.40 | -8.50 | -8.50 |
| <b>4OGH</b> | -7.40 | -8.80 | -7.60 | -7.20 | -7.20 | -8.00 | -7.20 | -8.10 | -9.20 | -7.93 |
| <b>4OM7</b> | -7.90 | -8.30 | -8.20 | -8.00 | -9.10 | -     | -8.80 | -8.20 | -8.50 | -8.30 |
| <b>4OYA</b> | -7.60 | -8.20 | -8.50 | -7.50 | -7.60 | -9.00 | -8.00 | -8.30 | -8.10 | -8.50 |
| <b>4PNZ</b> | -8.20 | -7.70 | -8.10 | -7.60 | -7.70 | -7.80 | -7.70 | -7.70 | -7.90 | -7.90 |
| <b>4PRG</b> | -7.60 | -8.80 | -8.40 | -8.30 | -7.80 | -8.40 | -7.90 | -8.10 | -7.90 | -8.07 |
| <b>4PVU</b> | -7.30 | -7.50 | -8.30 | -7.50 | -6.90 | -7.70 | -7.70 | -7.90 | -7.90 | -7.37 |
| <b>4PWL</b> | -8.30 | -7.60 | -8.80 | -7.80 | -7.60 | -7.70 | -7.30 | -7.50 | -7.70 | -7.87 |
| <b>4PZW</b> | -8.30 | -8.90 | -9.50 | -8.40 | -7.80 | -8.40 | -8.40 | -9.00 | -9.20 | -8.50 |
| <b>4Q9S</b> | -6.70 | -7.90 | -7.90 | -8.00 | -6.80 | -7.10 | -6.90 | -7.90 | -8.20 | -6.77 |
| <b>4QBZ</b> | -8.80 | -8.40 | -8.70 | -8.60 | -8.60 | -     | -8.10 | -8.60 | -9.10 | -8.40 |
| <b>4QC0</b> | -8.60 | -8.60 | -8.90 | -8.70 | -8.50 | -     | -8.20 | -9.20 | -8.70 | -8.67 |
| <b>4QTD</b> | -7.90 | -8.60 | -8.50 | -8.40 | -8.20 | -     | -8.50 | -9.70 | -8.90 | -8.00 |
| <b>4QVX</b> | -6.90 | -7.70 | -7.30 | -6.80 | -6.60 | -7.50 | -6.30 | -8.70 | -8.10 | -7.70 |
| <b>4R07</b> | -8.40 | -8.40 | -8.60 | -8.50 | -8.00 | -     | -8.60 | -8.70 | -9.00 | -7.93 |
| <b>4R08</b> | -8.60 | -8.50 | -8.30 | -8.40 | -8.50 | -     | -8.70 | -8.80 | -9.00 | -8.50 |
| <b>4R09</b> | -8.50 | -8.30 | -8.30 | -8.20 | -8.00 | -     | -8.20 | -9.10 | -8.60 | -8.27 |
| <b>4R0A</b> | -8.30 | -8.00 | -8.70 | -8.80 | -8.00 | -     | -7.40 | -8.50 | -8.80 | -7.87 |
| <b>4R3C</b> | -7.70 | -7.60 | -7.90 | -7.70 | -7.80 | -     | -7.70 | -8.20 | -7.90 | -7.70 |
| <b>4R6A</b> | -9.00 | -8.90 | -8.70 | -8.90 | -8.70 | -     | -8.50 | -9.20 | -8.90 | -9.00 |

|             |       |       |       |       |       |       |       |       |       |       |
|-------------|-------|-------|-------|-------|-------|-------|-------|-------|-------|-------|
| <b>4R7H</b> | -6.80 | -7.20 | -7.00 | -6.70 | -7.10 | -7.60 | -7.30 | -7.30 | -7.90 | -7.73 |
| <b>4RCH</b> | -8.10 | -8.10 | -8.70 | -8.10 | -8.20 | -8.40 | -7.90 | -7.80 | -8.40 | -7.70 |
| <b>4RG2</b> | -7.10 | -7.60 | -7.70 | -7.30 | -7.10 | -     | -6.80 | -7.70 | -7.20 | -7.57 |
| <b>4THN</b> | -8.50 | -7.40 | -8.00 | -8.70 | -7.20 | -     | -7.40 | -6.60 | -6.90 | -7.47 |
| <b>4TPK</b> | -9.20 | -9.40 | -9.70 | -9.20 | -9.20 | -8.80 | -9.40 | -8.80 | -9.10 | -9.03 |
| <b>4TUH</b> | -8.20 | -8.20 | -8.30 | -8.40 | -8.00 | -8.40 | -8.50 | -9.20 | -8.40 | -8.13 |
| <b>4TUZ</b> | -7.60 | -7.00 | -8.50 | -8.00 | -7.50 | -7.60 | -8.00 | -7.60 | -7.80 | -7.53 |
| <b>4TV1</b> | -7.60 | -7.10 | -8.20 | -8.10 | -7.30 | -7.80 | -7.60 | -7.40 | -7.40 | -7.47 |
| <b>4TW8</b> | -8.10 | -7.40 | -8.10 | -7.80 | -7.60 | -8.60 | -7.50 | -7.50 | -7.50 | -7.57 |
| <b>4U7T</b> | -7.30 | -7.50 | -7.70 | -7.90 | -7.50 | -7.40 | -7.10 | -7.70 | -7.50 | -7.63 |
| <b>4UDB</b> | -8.50 | -7.50 | -8.80 | -7.70 | -7.70 | -7.60 | -8.00 | -7.00 | -7.90 | -8.27 |
| <b>4UDC</b> | -7.70 | -7.70 | -8.30 | -7.60 | -7.30 | -7.70 | -7.30 | -6.90 | -7.80 | -7.67 |
| <b>4UDD</b> | -7.70 | -7.60 | -8.20 | -7.70 | -7.40 | -7.90 | -7.90 | -7.10 | -7.80 | -8.20 |
| <b>4UE7</b> | -7.20 | -7.50 | -7.60 | -7.80 | -6.80 | -7.10 | -7.60 | -7.00 | -7.10 | -7.60 |
| <b>4URV</b> | -8.10 | -7.10 | -7.70 | -7.70 | -7.50 | -7.70 | -7.80 | -7.40 | -7.30 | -7.17 |
| <b>4W93</b> | -8.40 | -8.80 | -8.50 | -8.80 | -8.40 | -8.90 | -8.90 | -8.20 | -8.80 | -8.80 |
| <b>4W9P</b> | -8.60 | -8.40 | -9.10 | -8.60 | -7.30 | -8.30 | -7.80 | -9.30 | -8.60 | -7.93 |
| <b>4WH9</b> | -7.20 | -6.90 | -7.70 | -7.40 | -7.40 | -7.40 | -7.10 | -7.90 | -7.00 | -6.90 |
| <b>4WT2</b> | -9.00 | -7.70 | -8.30 | -8.90 | -7.80 | -7.90 | -7.50 | -7.70 | -9.00 | -8.00 |
| <b>4WUA</b> | -7.50 | -8.40 | -8.40 | -8.10 | -7.60 | -7.80 | -7.40 | -8.30 | -7.90 | -7.47 |
| <b>4WVS</b> | -6.20 | -6.40 | -6.40 | -6.20 | -5.60 | -6.10 | -6.20 | -6.70 | -6.20 | -5.67 |

|             |       |       |        |       |       |       |        |       |       |       |
|-------------|-------|-------|--------|-------|-------|-------|--------|-------|-------|-------|
| <b>4WVT</b> | -7.70 | -7.20 | -8.20  | -8.00 | -7.20 | -7.40 | -7.20  | -7.80 | -8.60 | -7.13 |
| <b>4WZV</b> | -7.80 | -7.50 | -7.60  | -7.40 | -7.30 | -7.90 | -7.80  | -7.80 | -7.70 | -8.07 |
| <b>4X30</b> | -7.40 | -6.80 | -6.80  | -7.50 | -6.60 | -7.20 | -6.90  | -7.20 | -7.00 | -7.20 |
| <b>4X9Y</b> | -8.30 | -8.50 | -8.20  | -8.40 | -7.60 | -8.20 | -8.00  | -8.00 | -8.20 | -7.50 |
| <b>4XCT</b> | -7.00 | -7.10 | -7.70  | -7.00 | -7.50 | -7.40 | -7.40  | -7.50 | -7.60 | -8.03 |
| <b>4XII</b> | -9.40 | -9.60 | -10.20 | -9.90 | -9.60 | -9.20 | -10.00 | -9.30 | -9.20 | -9.43 |
| <b>4XRY</b> | -7.70 | -8.20 | -9.60  | -8.40 | -8.10 | -8.70 | -8.10  | -7.70 | -8.80 | -8.40 |
| <b>4Y72</b> | -8.20 | -7.70 | -7.60  | -8.50 | -7.30 | -7.50 | -7.50  | -7.60 | -7.40 | -8.20 |
| <b>4ZH8</b> | -8.40 | -8.00 | -7.70  | -8.20 | -7.50 | -7.30 | -7.40  | -7.60 | -7.30 | -8.40 |
| <b>4ZSA</b> | -7.20 | -7.30 | -8.00  | -7.40 | -7.20 | -     | -7.00  | -7.20 | -7.80 | -7.77 |
| <b>4ZSH</b> | -7.70 | -7.00 | -7.20  | -7.10 | -7.00 | -6.90 | -6.60  | -7.10 | -6.90 | -7.10 |
| <b>4ZZN</b> | -7.60 | -7.80 | -7.80  | -7.80 | -7.50 | -     | -7.20  | -7.90 | -7.70 | -7.40 |
| <b>5ANS</b> | -8.10 | -9.30 | -9.30  | -8.80 | -8.60 | -8.70 | -8.90  | -9.50 | -9.60 | -8.60 |
| <b>5ANT</b> | -8.20 | -7.40 | -9.70  | -7.60 | -7.40 | -9.10 | -8.70  | -7.70 | -7.70 | -8.63 |
| <b>5ANU</b> | -6.50 | -6.90 | -7.40  | -6.50 | -6.10 | -7.30 | -6.70  | -6.70 | -7.20 | -6.40 |
| <b>5ANV</b> | -7.20 | -8.90 | -9.30  | -6.90 | -7.00 | -8.40 | -8.50  | -7.70 | -8.40 | -8.30 |
| <b>5ANW</b> | -7.60 | -7.10 | -7.80  | -6.70 | -6.50 | -6.80 | -6.60  | -6.80 | -7.80 | -7.27 |
| <b>5AWB</b> | -7.90 | -8.40 | -7.90  | -7.80 | -7.70 | -     | -7.10  | -7.70 | -8.90 | -7.60 |
| <b>5AWD</b> | -8.10 | -8.10 | -8.40  | -8.40 | -7.90 | -     | -7.30  | -7.80 | -8.80 | -7.60 |
| <b>5AWK</b> | -7.80 | -8.30 | -8.30  | -7.70 | -7.60 | -8.50 | -8.40  | -8.30 | -7.30 | -8.40 |
| <b>5B75</b> | -     | -8.80 | -8.90  | -     | -     | -     | -      | -     | -     | -     |

|             |       |        |       |       |       |       |       |       |       |       |
|-------------|-------|--------|-------|-------|-------|-------|-------|-------|-------|-------|
| <b>5C3H</b> | -6.20 | -6.50  | -6.70 | -6.30 | -5.90 | -6.40 | -5.80 | -6.40 | -6.50 | -6.20 |
| <b>5C91</b> | -7.40 | -7.80  | -7.80 | -7.50 | -7.70 | -     | -7.50 | -7.40 | -7.90 | -7.80 |
| <b>5CJ6</b> | -7.30 | -7.10  | -7.50 | -7.40 | -7.30 | -7.60 | -7.40 | -7.20 | -7.70 | -7.27 |
| <b>5CR1</b> | -7.10 | -7.30  | -7.30 | -7.00 | -7.00 | -8.20 | -7.30 | -7.20 | -6.90 | -7.10 |
| <b>5CSW</b> | -7.40 | -8.70  | -8.20 | -7.60 | -7.40 | -     | -7.50 | -8.50 | -8.70 | -8.00 |
| <b>5DCP</b> | -7.30 | -7.00  | -7.80 | -7.30 | -6.70 | -7.10 | -7.00 | -7.50 | -6.90 | -7.10 |
| <b>5E6H</b> | -7.50 | -9.30  | -8.40 | -7.70 | -8.30 | -8.40 | -8.20 | -7.70 | -8.90 | -7.67 |
| <b>5EGM</b> | -7.80 | -8.60  | -8.60 | -8.00 | -7.20 | -7.30 | -7.20 | -8.60 | -8.10 | -8.10 |
| <b>5EXO</b> | -6.70 | -6.70  | -6.30 | -6.80 | -6.30 | -6.70 | -6.10 | -6.70 | -6.50 | -6.40 |
| <b>5FC4</b> | -6.90 | -6.20  | -7.00 | -6.70 | -6.40 | -6.40 | -6.50 | -6.20 | -6.90 | -5.83 |
| <b>5FNC</b> | -9.00 | -9.00  | -9.20 | -9.10 | -8.00 | -     | -7.90 | -7.60 | -9.60 | -7.90 |
| <b>5FQT</b> | -7.40 | -7.40  | -9.20 | -7.20 | -7.30 | -6.80 | -6.60 | -6.70 | -7.00 | -7.17 |
| <b>5G3J</b> | -7.30 | -7.30  | -9.00 | -7.10 | -7.20 | -7.80 | -8.30 | -6.60 | -7.80 | -7.93 |
| <b>5G5W</b> | -7.40 | -7.50  | -7.10 | -7.40 | -6.70 | -7.30 | -7.70 | -7.20 | -7.90 | -7.57 |
| <b>5GPG</b> | -9.30 | -10.00 | -9.90 | -9.40 | -9.10 | -9.00 | -9.10 | -9.10 | -9.40 | -9.00 |
| <b>5GT4</b> | -7.20 | -9.00  | -9.20 | -7.40 | -7.40 | -8.90 | -9.60 | -7.50 | -8.50 | -8.87 |
| <b>5H1D</b> | -6.90 | -7.80  | -7.00 | -7.20 | -6.70 | -7.00 | -6.70 | -6.80 | -6.90 | -7.00 |
| <b>5HDL</b> | -8.30 | -7.70  | -9.70 | -8.70 | -7.70 | -     | -7.40 | -9.50 | -8.40 | -7.70 |
| <b>5HG8</b> | -7.60 | -7.30  | -8.30 | -7.50 | -7.60 | -     | -7.00 | -7.80 | -7.50 | -7.90 |
| <b>5HK1</b> | -6.80 | -6.90  | -7.60 | -7.40 | -7.00 | -7.80 | -7.40 | -7.00 | -7.10 | -7.57 |
| <b>5I7P</b> | -7.30 | -6.80  | -7.00 | -7.20 | -6.10 | -6.30 | -6.00 | -6.60 | -6.70 | -6.60 |

|             |       |       |       |       |       |       |       |       |       |       |
|-------------|-------|-------|-------|-------|-------|-------|-------|-------|-------|-------|
| <b>5IEZ</b> | -7.50 | -7.10 | -8.70 | -7.40 | -7.20 | -7.70 | -7.30 | -7.30 | -7.80 | -7.27 |
| <b>5ITU</b> | -8.00 | -8.10 | -8.60 | -9.30 | -7.90 | -8.30 | -7.90 | -8.40 | -8.20 | -7.87 |
| <b>5IXS</b> | -8.40 | -7.40 | -8.80 | -7.90 | -8.10 | -     | -8.20 | -8.10 | -8.50 | -7.77 |
| <b>5J20</b> | -8.50 | -8.00 | -8.80 | -7.90 | -7.40 | -7.80 | -6.80 | -7.80 | -7.70 | -7.10 |
| <b>5J2X</b> | -6.50 | -6.40 | -6.60 | -6.70 | -6.40 | -6.90 | -6.30 | -6.40 | -6.50 | -6.40 |
| <b>5J6N</b> | -6.80 | -7.10 | -7.30 | -7.20 | -7.40 | -7.60 | -7.50 | -7.20 | -7.10 | -6.77 |
| <b>5JFR</b> | -7.70 | -7.80 | -8.70 | -8.30 | -7.60 | -8.20 | -7.10 | -8.30 | -7.40 | -7.17 |
| <b>5K5E</b> | -9.10 | -9.30 | -9.80 | -9.70 | -9.10 | -8.80 | -8.90 | -9.00 | -9.40 | -9.17 |
| <b>5KBY</b> | -8.30 | -7.70 | -8.00 | -8.10 | -7.40 | -7.70 | -7.60 | -7.70 | -7.70 | -7.80 |
| <b>5KDI</b> | -8.30 | -8.00 | -8.60 | -8.50 | -7.70 | -8.20 | -7.60 | -7.90 | -7.90 | -7.83 |
| <b>5KXA</b> | -7.50 | -7.80 | -8.50 | -8.30 | -7.80 | -8.10 | -7.80 | -7.90 | -8.60 | -8.03 |
| <b>5KYJ</b> | -8.20 | -8.00 | -8.30 | -8.00 | -7.80 | -7.90 | -8.30 | -7.80 | -8.00 | -7.77 |
| <b>5L9B</b> | -7.40 | -7.50 | -7.40 | -7.30 | -6.50 | -7.40 | -6.80 | -6.60 | -7.20 | -7.10 |
| <b>5LOF</b> | -8.50 | -8.00 | -9.10 | -8.60 | -8.00 | -9.40 | -9.30 | -8.60 | -9.20 | -8.50 |
| <b>5NJK</b> | -7.70 | -7.60 | -8.00 | -7.40 | -7.40 | -7.50 | -7.90 | -7.60 | -7.60 | -7.73 |
| <b>5NJX</b> | -6.70 | -6.90 | -7.30 | -     | -     | -7.00 | -     | -     | -     | -7.00 |
| <b>5NZO</b> | -7.40 | -6.80 | -7.30 | -7.20 | -6.50 | -     | -6.20 | -7.30 | -7.20 | -7.33 |
| <b>5NZP</b> | -7.60 | -6.80 | -7.30 | -7.20 | -6.70 | -     | -6.80 | -7.10 | -7.10 | -7.20 |
| <b>5OMP</b> | -7.60 | -6.80 | -7.90 | -     | -     | -7.20 | -     | -     | -     | -6.97 |
| <b>5ORL</b> | -7.60 | -8.00 | -8.80 | -7.60 | -6.70 | -8.60 | -7.30 | -9.20 | -9.10 | -7.37 |
| <b>5T8E</b> | -7.40 | -7.30 | -7.20 | -7.30 | -7.60 | -7.60 | -6.70 | -7.90 | -7.70 | -7.43 |

|             |       |       |       |       |       |       |       |       |       |       |
|-------------|-------|-------|-------|-------|-------|-------|-------|-------|-------|-------|
| <b>5TKS</b> | -8.30 | -7.40 | -7.60 | -8.40 | -7.50 | -7.20 | -7.10 | -8.10 | -7.30 | -7.10 |
| <b>5TQ3</b> | -8.30 | -8.40 | -8.70 | -8.20 | -8.50 | -8.30 | -8.10 | -7.90 | -8.20 | -8.13 |
| <b>5TQE</b> | -7.70 | -6.80 | -7.20 | -7.50 | -7.00 | -7.10 | -6.60 | -6.80 | -6.90 | -6.53 |
| <b>5TWZ</b> | -7.20 | -7.10 | -8.10 | -7.70 | -8.10 | -8.00 | -7.60 | -7.70 | -7.40 | -7.43 |
| <b>5UAK</b> | -7.50 | -6.80 | -7.90 | -7.20 | -7.30 | -7.90 | -7.30 | -7.60 | -7.30 | -7.70 |
| <b>5UCH</b> | -7.70 | -7.60 | -8.00 | -7.80 | -7.40 | -7.50 | -7.50 | -8.20 | -7.80 | -8.00 |
| <b>5UF9</b> | -7.20 | -7.30 | -8.30 | -8.20 | -7.60 | -7.10 | -7.20 | -7.60 | -7.70 | -7.97 |
| <b>5UG8</b> | -7.00 | -7.70 | -7.60 | -7.70 | -7.30 | -     | -7.40 | -7.70 | -7.80 | -7.47 |
| <b>5VAD</b> | -7.90 | -7.50 | -8.30 | -7.80 | -8.20 | -     | -8.30 | -8.10 | -7.80 | -7.70 |
| <b>6ASY</b> | -7.70 | -7.60 | -8.20 | -7.90 | -7.30 | -7.70 | -7.40 | -8.20 | -7.70 | -7.63 |
| <b>6BCA</b> | -7.00 | -7.30 | -7.90 | -7.30 | -6.80 | -6.90 | -6.60 | -6.70 | -7.30 | -7.20 |

**Table S2.** Additional information for the 10 proteins with highest affinity score Table 2.

| Gene   | Uniprot ID | Protein                                     | Class |
|--------|------------|---------------------------------------------|-------|
| NTRK1  | P04629     | High affinity nerve growth factor receptor  | 2     |
| HSPB1  | P04792     | Heat shock protein beta-1                   | 1     |
| NOS3   | P29474     | Nitric oxide synthase, endothelial          | 4     |
| MTOR   | P42345     | Serine/threonine-protein kinase mTOR        | 2     |
| NOS2   | P35228     | Nitric oxide synthase, inducible            | 4     |
| RORA   | P35398     | Nuclear receptor ROR-alpha                  | 3     |
| AGER   | Q15109     | Glycosylation end product-specific receptor | 5     |
| BCHE   | P06276     | Cholinesterase                              | 6     |
| DHFR   | P00374     | Dihydrofolate reductase                     | 4     |
| AKR1C3 | P42330     | Aldo-keto reductase family 1 member C3      | 4     |

Class: 1. Chaperone; 2. Isomerase/Transferase; 3. Lipid binding protein; 4. Oxido reductase; 5. Transport protein/Signaling protein; 6. Hidrolase



**Table S3.** Node code and respective name for protein in Figure 3.

| <b>NODE CODE</b> | <b>PROTEIN NAME</b>                                           |
|------------------|---------------------------------------------------------------|
| HSP90AB1         | Heat shock protein HSP 90-beta                                |
| DHFR             | Dihydrofolate reductase                                       |
| NUDT1            | 7,8-dihydro-8-oxoguanine triphosphatase                       |
| SERPINE1         | Plasminogen activator inhibitor 1                             |
| ANPEP            | Aminopeptidase N                                              |
| FKBP4            | Peptidyl-prolyl cis-trans isomerase FKBP4                     |
| BCHE             | Cholinesterase                                                |
| MCL1             | Induced myeloid leukemia cell differentiation protein Mcl-1   |
| RXRA             | Retinoic acid receptor RXR-alpha; Receptor for retinoic acid. |
| HSD17B1          | Estradiol 17-beta-dehydrogenase 1                             |
| NOS2             | Nitric oxide synthase, inducible                              |
| RXRB             | Retinoic acid receptor RXR-beta                               |
| FKBP3            | Peptidyl-prolyl cis-trans isomerase FKBP3                     |
| NOS3             | Nitric oxide synthase, endothelial                            |
| CLK1             | Dual specificity protein kinase CLK1                          |
| AKR1C3           | Aldo-keto reductase family 1 member C3                        |
| PCSK9            | Proprotein convertase subtilisin/kexin type 9                 |
| TOP2A            | DNA topoisomerase 2-alpha                                     |
| CYP3A4           | Cytochrome P450 3A4                                           |
| RORC             | Nuclear receptor ROR-gamma                                    |
| RORA             | Nuclear receptor ROR-alpha                                    |
| AGER             | Advanced glycosylation end product-specific receptor          |
| NR5A2            | Nuclear receptor subfamily 5 group A member 2                 |
| HSPB1            | Heat shock protein beta-1                                     |
| NTRK1            | High affinity nerve growth factor receptor                    |
| ACVR1            | Activin receptor type-1                                       |
| HSP90AA1         | Heat shock protein HSP 90-alpha                               |
| HSD11B1          | Corticosteroid 11-beta-dehydrogenase isozyme 1                |
| TXNRD1           | Thioredoxin reductase 1, cytoplasmic                          |
| AKT2             | RAC-beta serine/threonine-protein kinase                      |
| NR1H2            | Oxysterols receptor LXR-beta                                  |
| AKT1             | RAC-alpha serine/threonine-protein kinase                     |

### 3. PPI NETWORK ANALYSIS

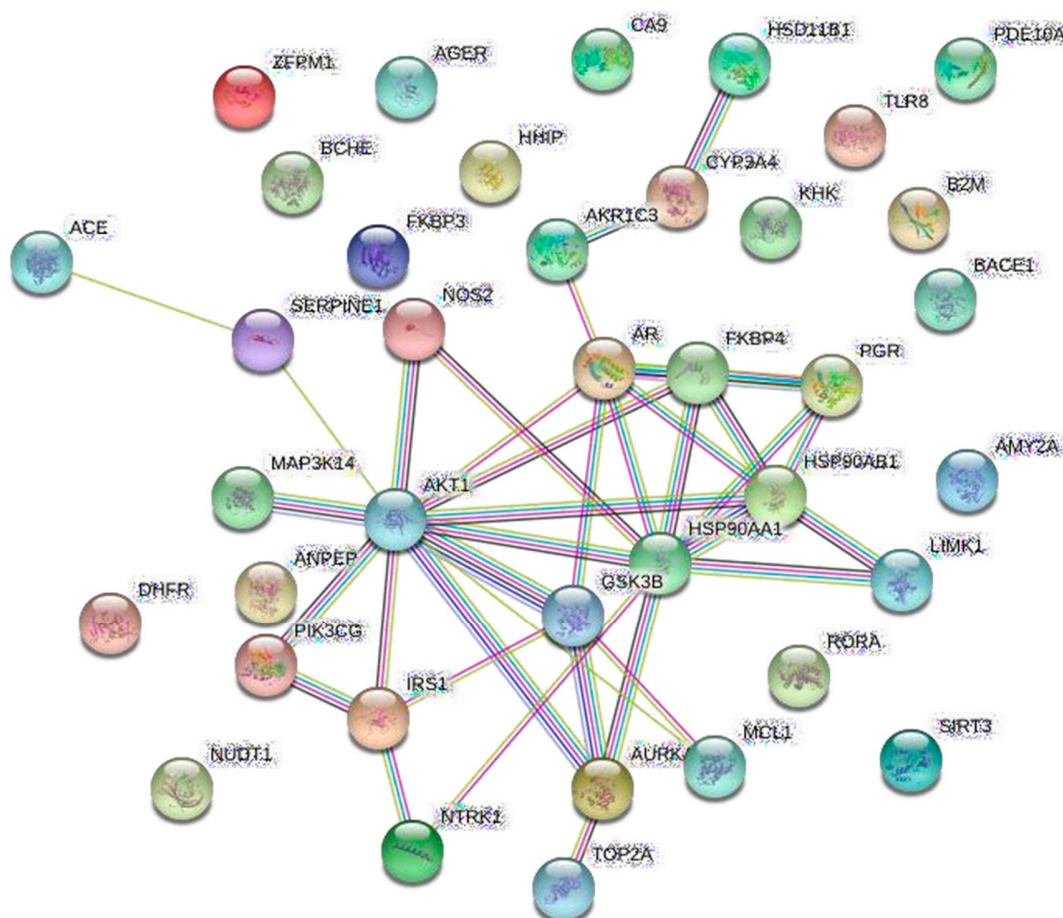

**Figure S1.** Predicted protein interaction network for complexes with voacristine alkaloid (PPI enrichment  $p$ -value:  $1.47 \times 10^{-13}$ /Minimum required interaction score: High confidence  $-0.700$ ). Edges represent the evidence of protein-protein associations. Nodes represent proteins with good binding affinity energies (lower than  $-9.0$  kcal/mol) with the molecule.

The results obtained for the best protein complexes with the alkaloid voacristine showed weak interactions with each other. Just 2 nodes are involved in physiological processes of alkaloid metabolism, however, the signaling cascades are independent. The HSP90AA1 are positioned as the center of the PPI network, having as main action the dimerization between their Alpha and Beta units and the protection of other macromolecules such as dihydrofolate reductase (DHFR), receptor for nerve growth factor (NTRK1) and the inhibition of the ubiquitination of nitric Oxide Synthase (NOS2) (Clapp, *et al.*, 2012).

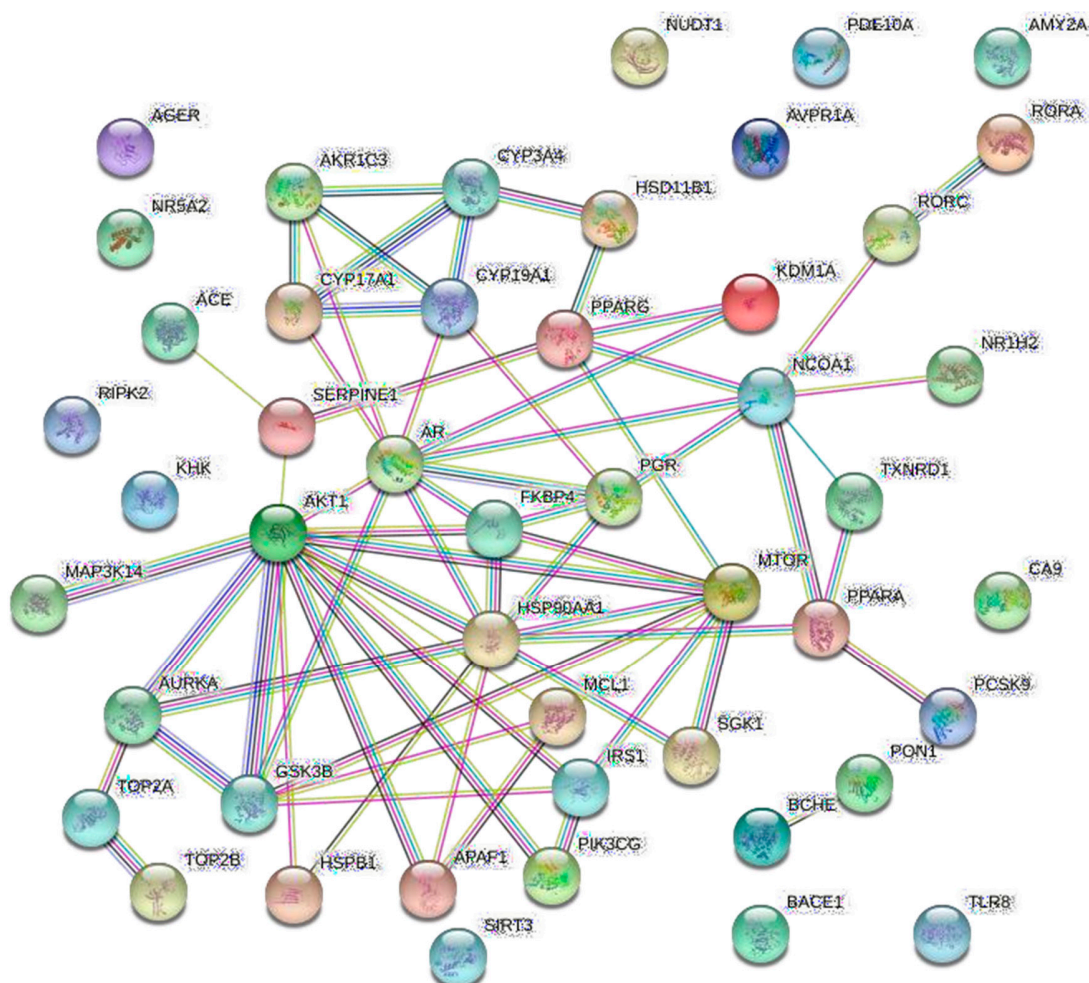

**Figure S2.** Predicted protein interaction network for complexes with voacangine-7-hydroxyndolenine alkaloid (PPI enrichment  $p$ -value:  $1.0 \times 10^{-16}$  / Minimum required interaction score: High confidence  $-0.700$ ). Edges represent the evidence of protein-protein associations. Nodes represent proteins with good binding affinity energies (lower than  $-9.0$  kcal/mol) with the molecule.

The main node of the network is found in the RAC- $\alpha$  serine/threonine-protein kinase (AKT1) protein, which has a close relationship with glycogen synthase kinase-3  $\beta$  (GSK3) and serine/threonine-protein kinase mTOR (MTOR) in signaling pathways that lead to the regulation of processes such as protein synthesis and cell cycle progression (Hermida, et al., 2017). Additionally, AKT1 regulates the expression of genes associated with cell differentiation, hormonal response and cell survival through its catalytic activity on the retinoic acid receptor RXR- $\beta$  (RXRB) and its subsequent binding as a heterodimer with oxysterols receptor LXR  $\alpha$  and  $\beta$  (Krężel, et al., 2019). The alkaloid voacangina-7-hidroxyndolenina has a hydroxyl group (OH) in position 7 on the indole group. Through the protein-protein

interaction network, it was shown how the presence of this group produces a response on proteins of metabolism of oxidizing agents, such as CYP3A4 monooxygenases, which we find as the second nucleus of the potential target network of voacangine-7-hydroxyindolenine. An interaction between protection proteins to the nervous system, such as serum paraoxonase/arylesterase 1 (PON1) and butyrylcholinesterase (BCHE), with CYP3A4 was found (Palikov, et al., 2020). Finally, we were able to visualize other proteins with REDOX functions such as aldo-keto reductase family 1 member C3 (AKR1C3), which main function is the conversion of ketones and aldehydes to alcohols leading to the detoxification of xenobiotics.

#### 4. Spectroscopic data for isolated alkaloids

The compound voacangine exhibited the following physical and spectral properties: Crystalline needles; Mp: 137–138 °C; Rf: 0.8 in hexane: ethyl acetate (6:4); <sup>1</sup>H NMR (300 MHz, CDCl<sub>3</sub>): δ 7.73 (s, NH), 7.17 (d, *J* = 8.7 Hz, H-12), 6.96 (d, *J* = 2.6 Hz, H-9), 6.84 (dd, *J* = 8.6 y 2.6 Hz, H-11), 3.89 (s, OCH<sub>3</sub>), 3.73 (s, CO<sub>2</sub>CH<sub>3</sub>), 0.92 (t, *J* = 7 Hz, H-18). <sup>13</sup>C NMR (75 MHz, CDCl<sub>3</sub>): δ 176.03 (CO<sub>2</sub>Me), 154.11 (C-10), 137.65 (C-2), 130.63 (C-13), 129.31 (C-8), 111.96 (C-11), 111.23 (C-12), 110.24 (C-9), 100.84 (C-7), 57.69 (C-21), 56.15 (OCH<sub>3</sub>), 55.25 (C-16), 53.24 (C-5), 52.74 (CO<sub>2</sub>CH<sub>3</sub>), 51.60 (C-3), 39.27 (C-20), 36.67 (C-17), 32.14 (C-15), 27.44 (C-14), 26.86 (C-19), 22.33 (C-6), 11.82 (C-18).

The compound voacangine-7-hydroxyindolenine exhibited the following physical and spectral properties: Amorphous yellow-green solid; Mp: 135–137 °C; Rf: 0.5 in hexane: ethyl acetate (6:4); <sup>1</sup>H NMR (300 MHz, CDCl<sub>3</sub>): δ 7.36 (d, *J* = 9 Hz, H-12), 6.91 (s, H-9), 6.80 (dd, *J* = 6 y 3 Hz, H-11), 3.82 (s, OCH<sub>3</sub>), 3.70 (s, CO<sub>2</sub>CH<sub>3</sub>), 0.86 (t, *J* = 7 Hz, H-18) ppm. <sup>13</sup>C NMR (75 MHz, CDCl<sub>3</sub>): δ 186.97 (C-2), 174.05 (CO<sub>2</sub>Me), 159.23 (C-10), 144.90 (C-13), 144.53 (C-8), 121.49 (C-12), 113.85 (C-11), 108.09 (C-9), 88.43 (C-7), 58.68 (C-21), 55.88 (ArOCH<sub>3</sub>; C16), 53.39 (CO<sub>2</sub>CH<sub>3</sub>), 49.22 (C-5), 48.75 (C-3), 37.68 (C-20), 34.63 (C-17), 34.25 (C-6), 32.14 (C-15), 27.08 (C-14), 26.62 (C-19), 11.71 (C-18).

The compound rupicoline exhibited the following physical and spectral properties: yellow crystals; Mp: 252–253 °C; Rf: 0.0 in hexane: ethyl acetate (6:4); <sup>1</sup>H NMR (300 MHz, CDCl<sub>3</sub>): δ 7.07 (dd, *J* = 8 y 3 Hz, H-11), 7.02 (s, H-9), 6.76 (d, *J* = 9 Hz, H-12), 4.29 (s, N-H), 3.95 (s, H-4), 3.76 (s, OCH<sub>3</sub>), 3.30 (s, CO<sub>2</sub>CH<sub>3</sub>), 1.91 (s, H-14), 0.91 (t, *J* = 6 Hz, H-18). <sup>13</sup>C NMR (75 MHz, CDCl<sub>3</sub>): δ 202.9 (C-7), 174.57 (CO<sub>2</sub>Me), 154.21 (C-10), 153.82 (C-13), 126.89 (C-11), 121.78 (C-8), 114.12 (C-12),

104.63 (C-9), 55.90 (ArOCH<sub>3</sub>), 52.07 (C-3), 52.07 (C-16), 52.05 (C-21),  
51.31  
(CO<sub>2</sub>CH<sub>3</sub>), 47.67 (C-5), 35.81 (C-20), 31.1 (C-15), 30.8 (C-17), 28.69 (C-19), 26.08  
(C-  
14), 25.77 (C-6), 12.14 (C-18).

## REFERENCES

1. Clapp, K. M., Peng, H. M., Jenkins, G. J., Ford, M. J., Morishima, Y., Lau, M., & Osawa, Y. (2012). Ubiquitination of neuronal nitric-oxide synthase in the calmodulin-binding site triggers proteasomal degradation of the protein. *Journal of Biological Chemistry*, 287(51), 42601–42610.
2. Hermida, M. A., Kumar, J. D., & Leslie, N. R. (2017). GSK3 and its interactions with the PI3K/AKT/mTOR signalling network. *Advances in biological regulation*, 65, 5–15.

3. Krężel, W., Rühl, R., & de Lera, A. R. (2019). Alternative retinoid X receptor (RXR) ligands. *Molecular and cellular endocrinology*, 491, 110436.
4. Palikov, V. A., Palikova, Y. A., & Dyachenko, I. A. (2020). Study of protective properties of butyrylcholinesterase in acute anticholinesterase poisoning on BChE-KO and BALB/c mice. *Research Results in Pharmacology*, 6, 41.
